# Supplementary material for: Influence of temperature on intraspecific, unbalanced dyadic contests between crabs
Source: PeerJ. 2019 Oct 23;7:e7845. doi: 10.7717/peerj.7845 (PMC6815193; doi:10.7717/peerj.7845)
Supplement: Data S1 [file peerj-07-7845-s001.csv]

ID	crab	contest_context	agonistic_type	interactions	sex	color	carapace_width	r_claw_length	r_claw_height	l_claw_length	l_claw_height	contest_result	temperature	fight_sex	fight_color	unique_fight_config
10ºr1	Non-observed	NA	NA	NA	Male	Green	37.07	20.85	8.68	17.6	6.87	Loser	10	M Vs.M	G Vs.G	G Vs.G and M Vs.M
10ºr1	Observed	Before	Approach	1	Male	Green	48.17	28.23	11.68	27.34	9.97	Winner	10	M Vs.M	G Vs.G	G Vs.G and M Vs.M
10ºr1	Observed	With	Approach	0	Male	Green	48.17	28.23	11.68	27.34	9.97	Winner	10	M Vs.M	G Vs.G	G Vs.G and M Vs.M
10ºr1	Observed	Without	Approach	0	Male	Green	48.17	28.23	11.68	27.34	9.97	Winner	10	M Vs.M	G Vs.G	G Vs.G and M Vs.M
10ºr1	Observed	Before	Attack	2	Male	Green	48.17	28.23	11.68	27.34	9.97	Winner	10	M Vs.M	G Vs.G	G Vs.G and M Vs.M
10ºr1	Observed	With	Attack	0	Male	Green	48.17	28.23	11.68	27.34	9.97	Winner	10	M Vs.M	G Vs.G	G Vs.G and M Vs.M
10ºr1	Observed	Without	Attack	0	Male	Green	48.17	28.23	11.68	27.34	9.97	Winner	10	M Vs.M	G Vs.G	G Vs.G and M Vs.M
10ºr1	Observed	Before	Retreat	0	Male	Green	48.17	28.23	11.68	27.34	9.97	Winner	10	M Vs.M	G Vs.G	G Vs.G and M Vs.M
10ºr1	Observed	With	Retreat	6	Male	Green	48.17	28.23	11.68	27.34	9.97	Winner	10	M Vs.M	G Vs.G	G Vs.G and M Vs.M
10ºr1	Observed	Without	Retreat	0	Male	Green	48.17	28.23	11.68	27.34	9.97	Winner	10	M Vs.M	G Vs.G	G Vs.G and M Vs.M
10ºr10	Non-observed	NA	NA	NA	Male	Green	41.36	21.81	8.85	21.97	8.01	Winner	10	M Vs.M	G Vs.G	G Vs.G and M Vs.M
10ºr10	Observed	Before	Approach	0	Male	Green	38.41	20.64	8.34	20.22	7.23	Loser	10	M Vs.M	G Vs.G	G Vs.G and M Vs.M
10ºr10	Observed	With	Approach	0	Male	Green	38.41	20.64	8.34	20.22	7.23	Loser	10	M Vs.M	G Vs.G	G Vs.G and M Vs.M
10ºr10	Observed	Without	Approach	6	Male	Green	38.41	20.64	8.34	20.22	7.23	Loser	10	M Vs.M	G Vs.G	G Vs.G and M Vs.M
10ºr10	Observed	Before	Attack	0	Male	Green	38.41	20.64	8.34	20.22	7.23	Loser	10	M Vs.M	G Vs.G	G Vs.G and M Vs.M
10ºr10	Observed	With	Attack	0	Male	Green	38.41	20.64	8.34	20.22	7.23	Loser	10	M Vs.M	G Vs.G	G Vs.G and M Vs.M
10ºr10	Observed	Without	Attack	5	Male	Green	38.41	20.64	8.34	20.22	7.23	Loser	10	M Vs.M	G Vs.G	G Vs.G and M Vs.M
10ºr10	Observed	Before	Retreat	0	Male	Green	38.41	20.64	8.34	20.22	7.23	Loser	10	M Vs.M	G Vs.G	G Vs.G and M Vs.M
10ºr10	Observed	With	Retreat	0	Male	Green	38.41	20.64	8.34	20.22	7.23	Loser	10	M Vs.M	G Vs.G	G Vs.G and M Vs.M
10ºr10	Observed	Without	Retreat	1	Male	Green	38.41	20.64	8.34	20.22	7.23	Loser	10	M Vs.M	G Vs.G	G Vs.G and M Vs.M
10ºr11	Non-observed	NA	NA	NA	Female	Green	35.14	16.03	7.03	16.7	6.55	Loser	10	M Vs.F	G Vs.G	G Vs.G and M Vs.F
10ºr11	Observed	Before	Approach	1	Male	Green	39.09	21.01	8.42	20.72	7.77	Winner	10	M Vs.F	G Vs.G	G Vs.G and M Vs.F
10ºr11	Observed	With	Approach	0	Male	Green	39.09	21.01	8.42	20.72	7.77	Winner	10	M Vs.F	G Vs.G	G Vs.G and M Vs.F
10ºr11	Observed	Without	Approach	0	Male	Green	39.09	21.01	8.42	20.72	7.77	Winner	10	M Vs.F	G Vs.G	G Vs.G and M Vs.F
10ºr11	Observed	Before	Attack	4	Male	Green	39.09	21.01	8.42	20.72	7.77	Winner	10	M Vs.F	G Vs.G	G Vs.G and M Vs.F
10ºr11	Observed	With	Attack	0	Male	Green	39.09	21.01	8.42	20.72	7.77	Winner	10	M Vs.F	G Vs.G	G Vs.G and M Vs.F
10ºr11	Observed	Without	Attack	0	Male	Green	39.09	21.01	8.42	20.72	7.77	Winner	10	M Vs.F	G Vs.G	G Vs.G and M Vs.F
10ºr11	Observed	Before	Retreat	0	Male	Green	39.09	21.01	8.42	20.72	7.77	Winner	10	M Vs.F	G Vs.G	G Vs.G and M Vs.F
10ºr11	Observed	With	Retreat	2	Male	Green	39.09	21.01	8.42	20.72	7.77	Winner	10	M Vs.F	G Vs.G	G Vs.G and M Vs.F
10ºr11	Observed	Without	Retreat	0	Male	Green	39.09	21.01	8.42	20.72	7.77	Winner	10	M Vs.F	G Vs.G	G Vs.G and M Vs.F
10ºr12	Non-observed	NA	NA	NA	Male	Green	44.11	23.35	9.25	23.25	8.62	Loser	10	M Vs.M	R Vs.G	R Vs.G and M Vs.M
10ºr12	Observed	Before	Approach	0	Male	Red	37.73	18.73	7.52	18.58	6.88	Winner	10	M Vs.M	R Vs.G	R Vs.G and M Vs.M
10ºr12	Observed	With	Approach	0	Male	Red	37.73	18.73	7.52	18.58	6.88	Winner	10	M Vs.M	R Vs.G	R Vs.G and M Vs.M
10ºr12	Observed	Without	Approach	0	Male	Red	37.73	18.73	7.52	18.58	6.88	Winner	10	M Vs.M	R Vs.G	R Vs.G and M Vs.M
10ºr12	Observed	Before	Attack	0	Male	Red	37.73	18.73	7.52	18.58	6.88	Winner	10	M Vs.M	R Vs.G	R Vs.G and M Vs.M
10ºr12	Observed	With	Attack	0	Male	Red	37.73	18.73	7.52	18.58	6.88	Winner	10	M Vs.M	R Vs.G	R Vs.G and M Vs.M
10ºr12	Observed	Without	Attack	0	Male	Red	37.73	18.73	7.52	18.58	6.88	Winner	10	M Vs.M	R Vs.G	R Vs.G and M Vs.M
10ºr12	Observed	Before	Retreat	4	Male	Red	37.73	18.73	7.52	18.58	6.88	Winner	10	M Vs.M	R Vs.G	R Vs.G and M Vs.M
10ºr12	Observed	With	Retreat	0	Male	Red	37.73	18.73	7.52	18.58	6.88	Winner	10	M Vs.M	R Vs.G	R Vs.G and M Vs.M
10ºr12	Observed	Without	Retreat	0	Male	Red	37.73	18.73	7.52	18.58	6.88	Winner	10	M Vs.M	R Vs.G	R Vs.G and M Vs.M
10ºr13	Non-observed	NA	NA	NA	Male	Red	60.06	36.65	15.99	35.26	13.65	Winner	10	F Vs.M	G Vs.R	G Vs.R and F Vs.M
10ºr13	Observed	Before	Approach	0	Female	Green	48.95	24.85	9.5	22.14	8.73	Loser	10	F Vs.M	G Vs.R	G Vs.R and F Vs.M
10ºr13	Observed	With	Approach	0	Female	Green	48.95	24.85	9.5	22.14	8.73	Loser	10	F Vs.M	G Vs.R	G Vs.R and F Vs.M
10ºr13	Observed	Without	Approach	3	Female	Green	48.95	24.85	9.5	22.14	8.73	Loser	10	F Vs.M	G Vs.R	G Vs.R and F Vs.M
10ºr13	Observed	Before	Attack	0	Female	Green	48.95	24.85	9.5	22.14	8.73	Loser	10	F Vs.M	G Vs.R	G Vs.R and F Vs.M
10ºr13	Observed	With	Attack	0	Female	Green	48.95	24.85	9.5	22.14	8.73	Loser	10	F Vs.M	G Vs.R	G Vs.R and F Vs.M
10ºr13	Observed	Without	Attack	1	Female	Green	48.95	24.85	9.5	22.14	8.73	Loser	10	F Vs.M	G Vs.R	G Vs.R and F Vs.M
10ºr13	Observed	Before	Retreat	0	Female	Green	48.95	24.85	9.5	22.14	8.73	Loser	10	F Vs.M	G Vs.R	G Vs.R and F Vs.M
10ºr13	Observed	With	Retreat	0	Female	Green	48.95	24.85	9.5	22.14	8.73	Loser	10	F Vs.M	G Vs.R	G Vs.R and F Vs.M
10ºr13	Observed	Without	Retreat	3	Female	Green	48.95	24.85	9.5	22.14	8.73	Loser	10	F Vs.M	G Vs.R	G Vs.R and F Vs.M
10ºr14	Non-observed	NA	NA	NA	Male	Green	40.2	21.09	8.31	15.04	7.39	Winner	10	M Vs.M	G Vs.G	G Vs.G and M Vs.M
10ºr14	Observed	Before	Approach	0	Male	Green	39	19.45	8.2	19.32	7.36	Loser	10	M Vs.M	G Vs.G	G Vs.G and M Vs.M
10ºr14	Observed	With	Approach	0	Male	Green	39	19.45	8.2	19.32	7.36	Loser	10	M Vs.M	G Vs.G	G Vs.G and M Vs.M
10ºr14	Observed	Without	Approach	0	Male	Green	39	19.45	8.2	19.32	7.36	Loser	10	M Vs.M	G Vs.G	G Vs.G and M Vs.M
10ºr14	Observed	Before	Attack	0	Male	Green	39	19.45	8.2	19.32	7.36	Loser	10	M Vs.M	G Vs.G	G Vs.G and M Vs.M
10ºr14	Observed	With	Attack	0	Male	Green	39	19.45	8.2	19.32	7.36	Loser	10	M Vs.M	G Vs.G	G Vs.G and M Vs.M
10ºr14	Observed	Without	Attack	0	Male	Green	39	19.45	8.2	19.32	7.36	Loser	10	M Vs.M	G Vs.G	G Vs.G and M Vs.M
10ºr14	Observed	Before	Retreat	0	Male	Green	39	19.45	8.2	19.32	7.36	Loser	10	M Vs.M	G Vs.G	G Vs.G and M Vs.M
10ºr14	Observed	With	Retreat	0	Male	Green	39	19.45	8.2	19.32	7.36	Loser	10	M Vs.M	G Vs.G	G Vs.G and M Vs.M
10ºr14	Observed	Without	Retreat	0	Male	Green	39	19.45	8.2	19.32	7.36	Loser	10	M Vs.M	G Vs.G	G Vs.G and M Vs.M
10ºr15	Non-observed	NA	NA	NA	Female	Green	38.22	19.23	7.98	19.01	7.15	Winner	10	M Vs.F	R Vs.G	R Vs.G and M Vs.F
10ºr15	Observed	Before	Approach	0	Male	Red	46.22	25.72	10.98	24.8	9.82	Loser	10	M Vs.F	R Vs.G	R Vs.G and M Vs.F
10ºr15	Observed	With	Approach	0	Male	Red	46.22	25.72	10.98	24.8	9.82	Loser	10	M Vs.F	R Vs.G	R Vs.G and M Vs.F
10ºr15	Observed	Without	Approach	5	Male	Red	46.22	25.72	10.98	24.8	9.82	Loser	10	M Vs.F	R Vs.G	R Vs.G and M Vs.F
10ºr15	Observed	Before	Attack	0	Male	Red	46.22	25.72	10.98	24.8	9.82	Loser	10	M Vs.F	R Vs.G	R Vs.G and M Vs.F
10ºr15	Observed	With	Attack	0	Male	Red	46.22	25.72	10.98	24.8	9.82	Loser	10	M Vs.F	R Vs.G	R Vs.G and M Vs.F
10ºr15	Observed	Without	Attack	3	Male	Red	46.22	25.72	10.98	24.8	9.82	Loser	10	M Vs.F	R Vs.G	R Vs.G and M Vs.F
10ºr15	Observed	Before	Retreat	0	Male	Red	46.22	25.72	10.98	24.8	9.82	Loser	10	M Vs.F	R Vs.G	R Vs.G and M Vs.F
10ºr15	Observed	With	Retreat	0	Male	Red	46.22	25.72	10.98	24.8	9.82	Loser	10	M Vs.F	R Vs.G	R Vs.G and M Vs.F
10ºr15	Observed	Without	Retreat	0	Male	Red	46.22	25.72	10.98	24.8	9.82	Loser	10	M Vs.F	R Vs.G	R Vs.G and M Vs.F
10ºr16	Non-observed	NA	NA	NA	Male	Green	43.1	16.52	8.5	23.44	8.97	Loser	10	M Vs.M	G Vs.G	G Vs.G and M Vs.M
10ºr16	Observed	Before	Approach	0	Male	Green	45.61	27.6	11.6	25.35	9.75	Winner	10	M Vs.M	G Vs.G	G Vs.G and M Vs.M
10ºr16	Observed	With	Approach	0	Male	Green	45.61	27.6	11.6	25.35	9.75	Winner	10	M Vs.M	G Vs.G	G Vs.G and M Vs.M
10ºr16	Observed	Without	Approach	0	Male	Green	45.61	27.6	11.6	25.35	9.75	Winner	10	M Vs.M	G Vs.G	G Vs.G and M Vs.M
10ºr16	Observed	Before	Attack	1	Male	Green	45.61	27.6	11.6	25.35	9.75	Winner	10	M Vs.M	G Vs.G	G Vs.G and M Vs.M
10ºr16	Observed	With	Attack	0	Male	Green	45.61	27.6	11.6	25.35	9.75	Winner	10	M Vs.M	G Vs.G	G Vs.G and M Vs.M
10ºr16	Observed	Without	Attack	0	Male	Green	45.61	27.6	11.6	25.35	9.75	Winner	10	M Vs.M	G Vs.G	G Vs.G and M Vs.M
10ºr16	Observed	Before	Retreat	0	Male	Green	45.61	27.6	11.6	25.35	9.75	Winner	10	M Vs.M	G Vs.G	G Vs.G and M Vs.M
10ºr16	Observed	With	Retreat	4	Male	Green	45.61	27.6	11.6	25.35	9.75	Winner	10	M Vs.M	G Vs.G	G Vs.G and M Vs.M
10ºr16	Observed	Without	Retreat	1	Male	Green	45.61	27.6	11.6	25.35	9.75	Winner	10	M Vs.M	G Vs.G	G Vs.G and M Vs.M
10ºr2	Non-observed	NA	NA	NA	Male	Green	50.11	28.16	11.76	27.28	10.68	Winner	10	M Vs.M	G Vs.G	G Vs.G and M Vs.M
10ºr2	Observed	Before	Approach	2	Male	Green	48.1	25.91	10.08	25.16	9.46	Loser	10	M Vs.M	G Vs.G	G Vs.G and M Vs.M
10ºr2	Observed	With	Approach	0	Male	Green	48.1	25.91	10.08	25.16	9.46	Loser	10	M Vs.M	G Vs.G	G Vs.G and M Vs.M
10ºr2	Observed	Without	Approach	6	Male	Green	48.1	25.91	10.08	25.16	9.46	Loser	10	M Vs.M	G Vs.G	G Vs.G and M Vs.M
10ºr2	Observed	Before	Attack	0	Male	Green	48.1	25.91	10.08	25.16	9.46	Loser	10	M Vs.M	G Vs.G	G Vs.G and M Vs.M
10ºr2	Observed	With	Attack	0	Male	Green	48.1	25.91	10.08	25.16	9.46	Loser	10	M Vs.M	G Vs.G	G Vs.G and M Vs.M
10ºr2	Observed	Without	Attack	5	Male	Green	48.1	25.91	10.08	25.16	9.46	Loser	10	M Vs.M	G Vs.G	G Vs.G and M Vs.M
10ºr2	Observed	Before	Retreat	0	Male	Green	48.1	25.91	10.08	25.16	9.46	Loser	10	M Vs.M	G Vs.G	G Vs.G and M Vs.M
10ºr2	Observed	With	Retreat	0	Male	Green	48.1	25.91	10.08	25.16	9.46	Loser	10	M Vs.M	G Vs.G	G Vs.G and M Vs.M
10ºr2	Observed	Without	Retreat	2	Male	Green	48.1	25.91	10.08	25.16	9.46	Loser	10	M Vs.M	G Vs.G	G Vs.G and M Vs.M
10ºr3	Non-observed	NA	NA	NA	Male	Green	43.25	22.71	9.38	20.36	8.78	Winner	10	F Vs.M	G Vs.G	G Vs.G and F Vs.M
10ºr3	Observed	Before	Approach	1	Female	Green	44.83	21.66	8.38	22.37	8.07	Loser	10	F Vs.M	G Vs.G	G Vs.G and F Vs.M
10ºr3	Observed	With	Approach	0	Female	Green	44.83	21.66	8.38	22.37	8.07	Loser	10	F Vs.M	G Vs.G	G Vs.G and F Vs.M
10ºr3	Observed	Without	Approach	0	Female	Green	44.83	21.66	8.38	22.37	8.07	Loser	10	F Vs.M	G Vs.G	G Vs.G and F Vs.M
10ºr3	Observed	Before	Attack	2	Female	Green	44.83	21.66	8.38	22.37	8.07	Loser	10	F Vs.M	G Vs.G	G Vs.G and F Vs.M
10ºr3	Observed	With	Attack	0	Female	Green	44.83	21.66	8.38	22.37	8.07	Loser	10	F Vs.M	G Vs.G	G Vs.G and F Vs.M
10ºr3	Observed	Without	Attack	0	Female	Green	44.83	21.66	8.38	22.37	8.07	Loser	10	F Vs.M	G Vs.G	G Vs.G and F Vs.M
10ºr3	Observed	Before	Retreat	2	Female	Green	44.83	21.66	8.38	22.37	8.07	Loser	10	F Vs.M	G Vs.G	G Vs.G and F Vs.M
10ºr3	Observed	With	Retreat	0	Female	Green	44.83	21.66	8.38	22.37	8.07	Loser	10	F Vs.M	G Vs.G	G Vs.G and F Vs.M
10ºr3	Observed	Without	Retreat	0	Female	Green	44.83	21.66	8.38	22.37	8.07	Loser	10	F Vs.M	G Vs.G	G Vs.G and F Vs.M
10ºr4	Non-observed	NA	NA	NA	Male	Green	38.14	21.11	7.89	26.8	7.8	Loser	10	M Vs.M	G Vs.G	G Vs.G and M Vs.M
10ºr4	Observed	Before	Approach	0	Male	Green	41.1	21.78	8.9	27.9	8.09	Winner	10	M Vs.M	G Vs.G	G Vs.G and M Vs.M
10ºr4	Observed	With	Approach	0	Male	Green	41.1	21.78	8.9	27.9	8.09	Winner	10	M Vs.M	G Vs.G	G Vs.G and M Vs.M
10ºr4	Observed	Without	Approach	0	Male	Green	41.1	21.78	8.9	27.9	8.09	Winner	10	M Vs.M	G Vs.G	G Vs.G and M Vs.M
10ºr4	Observed	Before	Attack	0	Male	Green	41.1	21.78	8.9	27.9	8.09	Winner	10	M Vs.M	G Vs.G	G Vs.G and M Vs.M
10ºr4	Observed	With	Attack	1	Male	Green	41.1	21.78	8.9	27.9	8.09	Winner	10	M Vs.M	G Vs.G	G Vs.G and M Vs.M
10ºr4	Observed	Without	Attack	0	Male	Green	41.1	21.78	8.9	27.9	8.09	Winner	10	M Vs.M	G Vs.G	G Vs.G and M Vs.M
10ºr4	Observed	Before	Retreat	0	Male	Green	41.1	21.78	8.9	27.9	8.09	Winner	10	M Vs.M	G Vs.G	G Vs.G and M Vs.M
10ºr4	Observed	With	Retreat	4	Male	Green	41.1	21.78	8.9	27.9	8.09	Winner	10	M Vs.M	G Vs.G	G Vs.G and M Vs.M
10ºr4	Observed	Without	Retreat	0	Male	Green	41.1	21.78	8.9	27.9	8.09	Winner	10	M Vs.M	G Vs.G	G Vs.G and M Vs.M
10ºr5	Non-observed	NA	NA	NA	Male	Green	38.84	20.37	8.84	20.95	7.8	Winner	10	M Vs.M	G Vs.G	G Vs.G and M Vs.M
10ºr5	Observed	Before	Approach	0	Male	Green	39.53	21.34	8.49	20.8	7.61	Loser	10	M Vs.M	G Vs.G	G Vs.G and M Vs.M
10ºr5	Observed	With	Approach	0	Male	Green	39.53	21.34	8.49	20.8	7.61	Loser	10	M Vs.M	G Vs.G	G Vs.G and M Vs.M
10ºr5	Observed	Without	Approach	4	Male	Green	39.53	21.34	8.49	20.8	7.61	Loser	10	M Vs.M	G Vs.G	G Vs.G and M Vs.M
10ºr5	Observed	Before	Attack	0	Male	Green	39.53	21.34	8.49	20.8	7.61	Loser	10	M Vs.M	G Vs.G	G Vs.G and M Vs.M
10ºr5	Observed	With	Attack	0	Male	Green	39.53	21.34	8.49	20.8	7.61	Loser	10	M Vs.M	G Vs.G	G Vs.G and M Vs.M
10ºr5	Observed	Without	Attack	4	Male	Green	39.53	21.34	8.49	20.8	7.61	Loser	10	M Vs.M	G Vs.G	G Vs.G and M Vs.M
10ºr5	Observed	Before	Retreat	0	Male	Green	39.53	21.34	8.49	20.8	7.61	Loser	10	M Vs.M	G Vs.G	G Vs.G and M Vs.M
10ºr5	Observed	With	Retreat	0	Male	Green	39.53	21.34	8.49	20.8	7.61	Loser	10	M Vs.M	G Vs.G	G Vs.G and M Vs.M
10ºr5	Observed	Without	Retreat	0	Male	Green	39.53	21.34	8.49	20.8	7.61	Loser	10	M Vs.M	G Vs.G	G Vs.G and M Vs.M
10ºr6	Non-observed	NA	NA	NA	Male	Red	32	17.38	7.59	17.14	6.73	Winner	10	F Vs.M	G Vs.R	G Vs.R and F Vs.M
10ºr6	Observed	Before	Approach	0	Female	Green	47.14	21.21	9.35	22.51	9.31	Loser	10	F Vs.M	G Vs.R	G Vs.R and F Vs.M
10ºr6	Observed	With	Approach	0	Female	Green	47.14	21.21	9.35	22.51	9.31	Loser	10	F Vs.M	G Vs.R	G Vs.R and F Vs.M
10ºr6	Observed	Without	Approach	2	Female	Green	47.14	21.21	9.35	22.51	9.31	Loser	10	F Vs.M	G Vs.R	G Vs.R and F Vs.M
10ºr6	Observed	Before	Attack	0	Female	Green	47.14	21.21	9.35	22.51	9.31	Loser	10	F Vs.M	G Vs.R	G Vs.R and F Vs.M
10ºr6	Observed	With	Attack	0	Female	Green	47.14	21.21	9.35	22.51	9.31	Loser	10	F Vs.M	G Vs.R	G Vs.R and F Vs.M
10ºr6	Observed	Without	Attack	0	Female	Green	47.14	21.21	9.35	22.51	9.31	Loser	10	F Vs.M	G Vs.R	G Vs.R and F Vs.M
10ºr6	Observed	Before	Retreat	0	Female	Green	47.14	21.21	9.35	22.51	9.31	Loser	10	F Vs.M	G Vs.R	G Vs.R and F Vs.M
10ºr6	Observed	With	Retreat	0	Female	Green	47.14	21.21	9.35	22.51	9.31	Loser	10	F Vs.M	G Vs.R	G Vs.R and F Vs.M
10ºr6	Observed	Without	Retreat	0	Female	Green	47.14	21.21	9.35	22.51	9.31	Loser	10	F Vs.M	G Vs.R	G Vs.R and F Vs.M
10ºr7	Non-observed	NA	NA	NA	Male	Red	44.25	24.99	9.99	24.3	9.06	Winner	10	M Vs.M	G Vs.R	G Vs.R and M Vs.M
10ºr7	Observed	Before	Approach	0	Male	Green	39.96	22.46	9.27	20.29	8.59	Loser	10	M Vs.M	G Vs.R	G Vs.R and M Vs.M
10ºr7	Observed	With	Approach	0	Male	Green	39.96	22.46	9.27	20.29	8.59	Loser	10	M Vs.M	G Vs.R	G Vs.R and M Vs.M
10ºr7	Observed	Without	Approach	3	Male	Green	39.96	22.46	9.27	20.29	8.59	Loser	10	M Vs.M	G Vs.R	G Vs.R and M Vs.M
10ºr7	Observed	Before	Attack	0	Male	Green	39.96	22.46	9.27	20.29	8.59	Loser	10	M Vs.M	G Vs.R	G Vs.R and M Vs.M
10ºr7	Observed	With	Attack	0	Male	Green	39.96	22.46	9.27	20.29	8.59	Loser	10	M Vs.M	G Vs.R	G Vs.R and M Vs.M
10ºr7	Observed	Without	Attack	3	Male	Green	39.96	22.46	9.27	20.29	8.59	Loser	10	M Vs.M	G Vs.R	G Vs.R and M Vs.M
10ºr7	Observed	Before	Retreat	0	Male	Green	39.96	22.46	9.27	20.29	8.59	Loser	10	M Vs.M	G Vs.R	G Vs.R and M Vs.M
10ºr7	Observed	With	Retreat	0	Male	Green	39.96	22.46	9.27	20.29	8.59	Loser	10	M Vs.M	G Vs.R	G Vs.R and M Vs.M
10ºr7	Observed	Without	Retreat	0	Male	Green	39.96	22.46	9.27	20.29	8.59	Loser	10	M Vs.M	G Vs.R	G Vs.R and M Vs.M
10ºr8	Non-observed	NA	NA	NA	Female	Green	48.03	24.4	8.92	23.27	8.63	Winner	10	M Vs.F	G Vs.G	G Vs.G and M Vs.F
10ºr8	Observed	Before	Approach	0	Male	Green	37.16	18.91	7.61	18.81	7.14	Loser	10	M Vs.F	G Vs.G	G Vs.G and M Vs.F
10ºr8	Observed	With	Approach	0	Male	Green	37.16	18.91	7.61	18.81	7.14	Loser	10	M Vs.F	G Vs.G	G Vs.G and M Vs.F
10ºr8	Observed	Without	Approach	5	Male	Green	37.16	18.91	7.61	18.81	7.14	Loser	10	M Vs.F	G Vs.G	G Vs.G and M Vs.F
10ºr8	Observed	Before	Attack	0	Male	Green	37.16	18.91	7.61	18.81	7.14	Loser	10	M Vs.F	G Vs.G	G Vs.G and M Vs.F
10ºr8	Observed	With	Attack	0	Male	Green	37.16	18.91	7.61	18.81	7.14	Loser	10	M Vs.F	G Vs.G	G Vs.G and M Vs.F
10ºr8	Observed	Without	Attack	5	Male	Green	37.16	18.91	7.61	18.81	7.14	Loser	10	M Vs.F	G Vs.G	G Vs.G and M Vs.F
10ºr8	Observed	Before	Retreat	0	Male	Green	37.16	18.91	7.61	18.81	7.14	Loser	10	M Vs.F	G Vs.G	G Vs.G and M Vs.F
10ºr8	Observed	With	Retreat	0	Male	Green	37.16	18.91	7.61	18.81	7.14	Loser	10	M Vs.F	G Vs.G	G Vs.G and M Vs.F
10ºr8	Observed	Without	Retreat	0	Male	Green	37.16	18.91	7.61	18.81	7.14	Loser	10	M Vs.F	G Vs.G	G Vs.G and M Vs.F
10ºr9	Non-observed	NA	NA	NA	Female	Green	50.9	21.89	8.8	25.63	9.31	Winner	10	M Vs.F	G Vs.G	G Vs.G and M Vs.F
10ºr9	Observed	Before	Approach	1	Male	Green	42.59	22.08	9.56	20.89	8.44	Loser	10	M Vs.F	G Vs.G	G Vs.G and M Vs.F
10ºr9	Observed	With	Approach	0	Male	Green	42.59	22.08	9.56	20.89	8.44	Loser	10	M Vs.F	G Vs.G	G Vs.G and M Vs.F
10ºr9	Observed	Without	Approach	2	Male	Green	42.59	22.08	9.56	20.89	8.44	Loser	10	M Vs.F	G Vs.G	G Vs.G and M Vs.F
10ºr9	Observed	Before	Attack	0	Male	Green	42.59	22.08	9.56	20.89	8.44	Loser	10	M Vs.F	G Vs.G	G Vs.G and M Vs.F
10ºr9	Observed	With	Attack	0	Male	Green	42.59	22.08	9.56	20.89	8.44	Loser	10	M Vs.F	G Vs.G	G Vs.G and M Vs.F
10ºr9	Observed	Without	Attack	1	Male	Green	42.59	22.08	9.56	20.89	8.44	Loser	10	M Vs.F	G Vs.G	G Vs.G and M Vs.F
10ºr9	Observed	Before	Retreat	0	Male	Green	42.59	22.08	9.56	20.89	8.44	Loser	10	M Vs.F	G Vs.G	G Vs.G and M Vs.F
10ºr9	Observed	With	Retreat	0	Male	Green	42.59	22.08	9.56	20.89	8.44	Loser	10	M Vs.F	G Vs.G	G Vs.G and M Vs.F
10ºr9	Observed	Without	Retreat	10	Male	Green	42.59	22.08	9.56	20.89	8.44	Loser	10	M Vs.F	G Vs.G	G Vs.G and M Vs.F
13ºr1	Non-observed	NA	NA	NA	Female	Green	44.36	32.13	9.19	20.85	8.17	Loser	13	M Vs.F	R Vs.G	R Vs.G and M Vs.F
13ºr1	Observed	Before	Approach	0	Male	Red	46.71	28.63	11.85	25.98	9.83	Winner	13	M Vs.F	R Vs.G	R Vs.G and M Vs.F
13ºr1	Observed	With	Approach	0	Male	Red	46.71	28.63	11.85	25.98	9.83	Winner	13	M Vs.F	R Vs.G	R Vs.G and M Vs.F
13ºr1	Observed	Without	Approach	0	Male	Red	46.71	28.63	11.85	25.98	9.83	Winner	13	M Vs.F	R Vs.G	R Vs.G and M Vs.F
13ºr1	Observed	Before	Attack	0	Male	Red	46.71	28.63	11.85	25.98	9.83	Winner	13	M Vs.F	R Vs.G	R Vs.G and M Vs.F
13ºr1	Observed	With	Attack	0	Male	Red	46.71	28.63	11.85	25.98	9.83	Winner	13	M Vs.F	R Vs.G	R Vs.G and M Vs.F
13ºr1	Observed	Without	Attack	0	Male	Red	46.71	28.63	11.85	25.98	9.83	Winner	13	M Vs.F	R Vs.G	R Vs.G and M Vs.F
13ºr1	Observed	Before	Retreat	0	Male	Red	46.71	28.63	11.85	25.98	9.83	Winner	13	M Vs.F	R Vs.G	R Vs.G and M Vs.F
13ºr1	Observed	With	Retreat	8	Male	Red	46.71	28.63	11.85	25.98	9.83	Winner	13	M Vs.F	R Vs.G	R Vs.G and M Vs.F
13ºr1	Observed	Without	Retreat	0	Male	Red	46.71	28.63	11.85	25.98	9.83	Winner	13	M Vs.F	R Vs.G	R Vs.G and M Vs.F
13ºr10	Non-observed	NA	NA	NA	Female	Green	51.1	22.89	8.58	25.55	9.34	Winner	13	M Vs.F	G Vs.G	G Vs.G and M Vs.F
13ºr10	Observed	Before	Approach	4	Male	Green	41.16	22.64	9.08	16.71	6.34	Loser	13	M Vs.F	G Vs.G	G Vs.G and M Vs.F
13ºr10	Observed	With	Approach	0	Male	Green	41.16	22.64	9.08	16.71	6.34	Loser	13	M Vs.F	G Vs.G	G Vs.G and M Vs.F
13ºr10	Observed	Without	Approach	3	Male	Green	41.16	22.64	9.08	16.71	6.34	Loser	13	M Vs.F	G Vs.G	G Vs.G and M Vs.F
13ºr10	Observed	Before	Attack	3	Male	Green	41.16	22.64	9.08	16.71	6.34	Loser	13	M Vs.F	G Vs.G	G Vs.G and M Vs.F
13ºr10	Observed	With	Attack	0	Male	Green	41.16	22.64	9.08	16.71	6.34	Loser	13	M Vs.F	G Vs.G	G Vs.G and M Vs.F
13ºr10	Observed	Without	Attack	4	Male	Green	41.16	22.64	9.08	16.71	6.34	Loser	13	M Vs.F	G Vs.G	G Vs.G and M Vs.F
13ºr10	Observed	Before	Retreat	0	Male	Green	41.16	22.64	9.08	16.71	6.34	Loser	13	M Vs.F	G Vs.G	G Vs.G and M Vs.F
13ºr10	Observed	With	Retreat	0	Male	Green	41.16	22.64	9.08	16.71	6.34	Loser	13	M Vs.F	G Vs.G	G Vs.G and M Vs.F
13ºr10	Observed	Without	Retreat	1	Male	Green	41.16	22.64	9.08	16.71	6.34	Loser	13	M Vs.F	G Vs.G	G Vs.G and M Vs.F
13ºr11	Non-observed	NA	NA	NA	Male	Red	60.46	36.9	16.25	34.38	13.31	Winner	13	M Vs.M	G Vs.R	G Vs.R and M Vs.M
13ºr11	Observed	Before	Approach	0	Male	Green	36.38	18.37	7.41	17.74	6.67	Loser	13	M Vs.M	G Vs.R	G Vs.R and M Vs.M
13ºr11	Observed	With	Approach	0	Male	Green	36.38	18.37	7.41	17.74	6.67	Loser	13	M Vs.M	G Vs.R	G Vs.R and M Vs.M
13ºr11	Observed	Without	Approach	1	Male	Green	36.38	18.37	7.41	17.74	6.67	Loser	13	M Vs.M	G Vs.R	G Vs.R and M Vs.M
13ºr11	Observed	Before	Attack	0	Male	Green	36.38	18.37	7.41	17.74	6.67	Loser	13	M Vs.M	G Vs.R	G Vs.R and M Vs.M
13ºr11	Observed	With	Attack	0	Male	Green	36.38	18.37	7.41	17.74	6.67	Loser	13	M Vs.M	G Vs.R	G Vs.R and M Vs.M
13ºr11	Observed	Without	Attack	0	Male	Green	36.38	18.37	7.41	17.74	6.67	Loser	13	M Vs.M	G Vs.R	G Vs.R and M Vs.M
13ºr11	Observed	Before	Retreat	2	Male	Green	36.38	18.37	7.41	17.74	6.67	Loser	13	M Vs.M	G Vs.R	G Vs.R and M Vs.M
13ºr11	Observed	With	Retreat	0	Male	Green	36.38	18.37	7.41	17.74	6.67	Loser	13	M Vs.M	G Vs.R	G Vs.R and M Vs.M
13ºr11	Observed	Without	Retreat	1	Male	Green	36.38	18.37	7.41	17.74	6.67	Loser	13	M Vs.M	G Vs.R	G Vs.R and M Vs.M
13ºr12	Non-observed	NA	NA	NA	Male	Red	49.42	21	8.39	18.89	7.81	Winner	13	M Vs.M	R Vs.R	R Vs.R and M Vs.M
13ºr12	Observed	Before	Approach	0	Male	Red	38.19	19.17	7.25	19.23	6.89	Loser	13	M Vs.M	R Vs.R	R Vs.R and M Vs.M
13ºr12	Observed	With	Approach	0	Male	Red	38.19	19.17	7.25	19.23	6.89	Loser	13	M Vs.M	R Vs.R	R Vs.R and M Vs.M
13ºr12	Observed	Without	Approach	1	Male	Red	38.19	19.17	7.25	19.23	6.89	Loser	13	M Vs.M	R Vs.R	R Vs.R and M Vs.M
13ºr12	Observed	Before	Attack	0	Male	Red	38.19	19.17	7.25	19.23	6.89	Loser	13	M Vs.M	R Vs.R	R Vs.R and M Vs.M
13ºr12	Observed	With	Attack	0	Male	Red	38.19	19.17	7.25	19.23	6.89	Loser	13	M Vs.M	R Vs.R	R Vs.R and M Vs.M
13ºr12	Observed	Without	Attack	0	Male	Red	38.19	19.17	7.25	19.23	6.89	Loser	13	M Vs.M	R Vs.R	R Vs.R and M Vs.M
13ºr12	Observed	Before	Retreat	0	Male	Red	38.19	19.17	7.25	19.23	6.89	Loser	13	M Vs.M	R Vs.R	R Vs.R and M Vs.M
13ºr12	Observed	With	Retreat	0	Male	Red	38.19	19.17	7.25	19.23	6.89	Loser	13	M Vs.M	R Vs.R	R Vs.R and M Vs.M
13ºr12	Observed	Without	Retreat	0	Male	Red	38.19	19.17	7.25	19.23	6.89	Loser	13	M Vs.M	R Vs.R	R Vs.R and M Vs.M
13ºr13	Non-observed	NA	NA	NA	Male	Red	48.18	27.18	10.24	28.08	11.74	Winner	13	M Vs.M	G Vs.R	G Vs.R and M Vs.M
13ºr13	Observed	Before	Approach	1	Male	Green	39.74	21.86	9.26	19.75	7.88	Loser	13	M Vs.M	G Vs.R	G Vs.R and M Vs.M
13ºr13	Observed	With	Approach	0	Male	Green	39.74	21.86	9.26	19.75	7.88	Loser	13	M Vs.M	G Vs.R	G Vs.R and M Vs.M
13ºr13	Observed	Without	Approach	4	Male	Green	39.74	21.86	9.26	19.75	7.88	Loser	13	M Vs.M	G Vs.R	G Vs.R and M Vs.M
13ºr13	Observed	Before	Attack	2	Male	Green	39.74	21.86	9.26	19.75	7.88	Loser	13	M Vs.M	G Vs.R	G Vs.R and M Vs.M
13ºr13	Observed	With	Attack	0	Male	Green	39.74	21.86	9.26	19.75	7.88	Loser	13	M Vs.M	G Vs.R	G Vs.R and M Vs.M
13ºr13	Observed	Without	Attack	2	Male	Green	39.74	21.86	9.26	19.75	7.88	Loser	13	M Vs.M	G Vs.R	G Vs.R and M Vs.M
13ºr13	Observed	Before	Retreat	0	Male	Green	39.74	21.86	9.26	19.75	7.88	Loser	13	M Vs.M	G Vs.R	G Vs.R and M Vs.M
13ºr13	Observed	With	Retreat	0	Male	Green	39.74	21.86	9.26	19.75	7.88	Loser	13	M Vs.M	G Vs.R	G Vs.R and M Vs.M
13ºr13	Observed	Without	Retreat	2	Male	Green	39.74	21.86	9.26	19.75	7.88	Loser	13	M Vs.M	G Vs.R	G Vs.R and M Vs.M
13ºr14	Non-observed	NA	NA	NA	Male	Green	39.95	16.12	8.52	21	7.75	Winner	13	F Vs.M	R Vs.G	R Vs.G and F Vs.M
13ºr14	Observed	Before	Approach	3	Female	Red	47.85	23.74	9.52	21.83	9.18	Loser	13	F Vs.M	R Vs.G	R Vs.G and F Vs.M
13ºr14	Observed	With	Approach	0	Female	Red	47.85	23.74	9.52	21.83	9.18	Loser	13	F Vs.M	R Vs.G	R Vs.G and F Vs.M
13ºr14	Observed	Without	Approach	3	Female	Red	47.85	23.74	9.52	21.83	9.18	Loser	13	F Vs.M	R Vs.G	R Vs.G and F Vs.M
13ºr14	Observed	Before	Attack	2	Female	Red	47.85	23.74	9.52	21.83	9.18	Loser	13	F Vs.M	R Vs.G	R Vs.G and F Vs.M
13ºr14	Observed	With	Attack	0	Female	Red	47.85	23.74	9.52	21.83	9.18	Loser	13	F Vs.M	R Vs.G	R Vs.G and F Vs.M
13ºr14	Observed	Without	Attack	2	Female	Red	47.85	23.74	9.52	21.83	9.18	Loser	13	F Vs.M	R Vs.G	R Vs.G and F Vs.M
13ºr14	Observed	Before	Retreat	3	Female	Red	47.85	23.74	9.52	21.83	9.18	Loser	13	F Vs.M	R Vs.G	R Vs.G and F Vs.M
13ºr14	Observed	With	Retreat	0	Female	Red	47.85	23.74	9.52	21.83	9.18	Loser	13	F Vs.M	R Vs.G	R Vs.G and F Vs.M
13ºr14	Observed	Without	Retreat	0	Female	Red	47.85	23.74	9.52	21.83	9.18	Loser	13	F Vs.M	R Vs.G	R Vs.G and F Vs.M
13ºr15	Non-observed	NA	NA	NA	Male	Green	43.27	19.56	7.17	20.93	9.03	Winner	13	M Vs.M	G Vs.G	G Vs.G and M Vs.M
13ºr15	Observed	Before	Approach	0	Male	Green	41.91	21.35	8.95	20.73	7.98	Loser	13	M Vs.M	G Vs.G	G Vs.G and M Vs.M
13ºr15	Observed	With	Approach	0	Male	Green	41.91	21.35	8.95	20.73	7.98	Loser	13	M Vs.M	G Vs.G	G Vs.G and M Vs.M
13ºr15	Observed	Without	Approach	8	Male	Green	41.91	21.35	8.95	20.73	7.98	Loser	13	M Vs.M	G Vs.G	G Vs.G and M Vs.M
13ºr15	Observed	Before	Attack	0	Male	Green	41.91	21.35	8.95	20.73	7.98	Loser	13	M Vs.M	G Vs.G	G Vs.G and M Vs.M
13ºr15	Observed	With	Attack	0	Male	Green	41.91	21.35	8.95	20.73	7.98	Loser	13	M Vs.M	G Vs.G	G Vs.G and M Vs.M
13ºr15	Observed	Without	Attack	14	Male	Green	41.91	21.35	8.95	20.73	7.98	Loser	13	M Vs.M	G Vs.G	G Vs.G and M Vs.M
13ºr15	Observed	Before	Retreat	0	Male	Green	41.91	21.35	8.95	20.73	7.98	Loser	13	M Vs.M	G Vs.G	G Vs.G and M Vs.M
13ºr15	Observed	With	Retreat	0	Male	Green	41.91	21.35	8.95	20.73	7.98	Loser	13	M Vs.M	G Vs.G	G Vs.G and M Vs.M
13ºr15	Observed	Without	Retreat	2	Male	Green	41.91	21.35	8.95	20.73	7.98	Loser	13	M Vs.M	G Vs.G	G Vs.G and M Vs.M
13ºr16	Non-observed	NA	NA	NA	Female	Green	40.75	20.68	8.47	19.65	7.61	Winner	13	M Vs.F	R Vs.G	R Vs.G and M Vs.F
13ºr16	Observed	Before	Approach	2	Male	Red	31.62	19.27	8.13	18.37	7.4	Loser	13	M Vs.F	R Vs.G	R Vs.G and M Vs.F
13ºr16	Observed	With	Approach	0	Male	Red	31.62	19.27	8.13	18.37	7.4	Loser	13	M Vs.F	R Vs.G	R Vs.G and M Vs.F
13ºr16	Observed	Without	Approach	3	Male	Red	31.62	19.27	8.13	18.37	7.4	Loser	13	M Vs.F	R Vs.G	R Vs.G and M Vs.F
13ºr16	Observed	Before	Attack	7	Male	Red	31.62	19.27	8.13	18.37	7.4	Loser	13	M Vs.F	R Vs.G	R Vs.G and M Vs.F
13ºr16	Observed	With	Attack	0	Male	Red	31.62	19.27	8.13	18.37	7.4	Loser	13	M Vs.F	R Vs.G	R Vs.G and M Vs.F
13ºr16	Observed	Without	Attack	4	Male	Red	31.62	19.27	8.13	18.37	7.4	Loser	13	M Vs.F	R Vs.G	R Vs.G and M Vs.F
13ºr16	Observed	Before	Retreat	2	Male	Red	31.62	19.27	8.13	18.37	7.4	Loser	13	M Vs.F	R Vs.G	R Vs.G and M Vs.F
13ºr16	Observed	With	Retreat	1	Male	Red	31.62	19.27	8.13	18.37	7.4	Loser	13	M Vs.F	R Vs.G	R Vs.G and M Vs.F
13ºr16	Observed	Without	Retreat	0	Male	Red	31.62	19.27	8.13	18.37	7.4	Loser	13	M Vs.F	R Vs.G	R Vs.G and M Vs.F
13ºr17	Non-observed	NA	NA	NA	Female	Green	35.42	16.71	6.91	17.41	6.48	Loser	13	M Vs.F	G Vs.G	G Vs.G and M Vs.F
13ºr17	Observed	Before	Approach	1	Male	Green	38.87	21.27	7.93	19.44	7.63	Winner	13	M Vs.F	G Vs.G	G Vs.G and M Vs.F
13ºr17	Observed	With	Approach	0	Male	Green	38.87	21.27	7.93	19.44	7.63	Winner	13	M Vs.F	G Vs.G	G Vs.G and M Vs.F
13ºr17	Observed	Without	Approach	0	Male	Green	38.87	21.27	7.93	19.44	7.63	Winner	13	M Vs.F	G Vs.G	G Vs.G and M Vs.F
13ºr17	Observed	Before	Attack	1	Male	Green	38.87	21.27	7.93	19.44	7.63	Winner	13	M Vs.F	G Vs.G	G Vs.G and M Vs.F
13ºr17	Observed	With	Attack	0	Male	Green	38.87	21.27	7.93	19.44	7.63	Winner	13	M Vs.F	G Vs.G	G Vs.G and M Vs.F
13ºr17	Observed	Without	Attack	0	Male	Green	38.87	21.27	7.93	19.44	7.63	Winner	13	M Vs.F	G Vs.G	G Vs.G and M Vs.F
13ºr17	Observed	Before	Retreat	0	Male	Green	38.87	21.27	7.93	19.44	7.63	Winner	13	M Vs.F	G Vs.G	G Vs.G and M Vs.F
13ºr17	Observed	With	Retreat	1	Male	Green	38.87	21.27	7.93	19.44	7.63	Winner	13	M Vs.F	G Vs.G	G Vs.G and M Vs.F
13ºr17	Observed	Without	Retreat	0	Male	Green	38.87	21.27	7.93	19.44	7.63	Winner	13	M Vs.F	G Vs.G	G Vs.G and M Vs.F
13ºr18	Non-observed	NA	NA	NA	Male	Green	37.32	20.46	8.36	19.24	7.55	Loser	13	M Vs.M	R Vs.G	R Vs.G and M Vs.M
13ºr18	Observed	Before	Approach	1	Male	Red	45.29	24.75	9.5	23.39	8.82	Winner	13	M Vs.M	R Vs.G	R Vs.G and M Vs.M
13ºr18	Observed	With	Approach	0	Male	Red	45.29	24.75	9.5	23.39	8.82	Winner	13	M Vs.M	R Vs.G	R Vs.G and M Vs.M
13ºr18	Observed	Without	Approach	0	Male	Red	45.29	24.75	9.5	23.39	8.82	Winner	13	M Vs.M	R Vs.G	R Vs.G and M Vs.M
13ºr18	Observed	Before	Attack	0	Male	Red	45.29	24.75	9.5	23.39	8.82	Winner	13	M Vs.M	R Vs.G	R Vs.G and M Vs.M
13ºr18	Observed	With	Attack	1	Male	Red	45.29	24.75	9.5	23.39	8.82	Winner	13	M Vs.M	R Vs.G	R Vs.G and M Vs.M
13ºr18	Observed	Without	Attack	0	Male	Red	45.29	24.75	9.5	23.39	8.82	Winner	13	M Vs.M	R Vs.G	R Vs.G and M Vs.M
13ºr18	Observed	Before	Retreat	0	Male	Red	45.29	24.75	9.5	23.39	8.82	Winner	13	M Vs.M	R Vs.G	R Vs.G and M Vs.M
13ºr18	Observed	With	Retreat	7	Male	Red	45.29	24.75	9.5	23.39	8.82	Winner	13	M Vs.M	R Vs.G	R Vs.G and M Vs.M
13ºr18	Observed	Without	Retreat	0	Male	Red	45.29	24.75	9.5	23.39	8.82	Winner	13	M Vs.M	R Vs.G	R Vs.G and M Vs.M
13ºr2	Non-observed	NA	NA	NA	Male	Red	32.92	19.49	8.28	26.3	7.65	Loser	13	M Vs.M	G Vs.R	G Vs.R and M Vs.M
13ºr2	Observed	Before	Approach	1	Male	Green	42.01	22.59	8.86	21.23	8.14	Loser	13	M Vs.M	G Vs.R	G Vs.R and M Vs.M
13ºr2	Observed	With	Approach	0	Male	Green	42.01	22.59	8.86	21.23	8.14	Loser	13	M Vs.M	G Vs.R	G Vs.R and M Vs.M
13ºr2	Observed	Without	Approach	1	Male	Green	42.01	22.59	8.86	21.23	8.14	Loser	13	M Vs.M	G Vs.R	G Vs.R and M Vs.M
13ºr2	Observed	Before	Attack	0	Male	Green	42.01	22.59	8.86	21.23	8.14	Loser	13	M Vs.M	G Vs.R	G Vs.R and M Vs.M
13ºr2	Observed	With	Attack	0	Male	Green	42.01	22.59	8.86	21.23	8.14	Loser	13	M Vs.M	G Vs.R	G Vs.R and M Vs.M
13ºr2	Observed	Without	Attack	1	Male	Green	42.01	22.59	8.86	21.23	8.14	Loser	13	M Vs.M	G Vs.R	G Vs.R and M Vs.M
13ºr2	Observed	Before	Retreat	2	Male	Green	42.01	22.59	8.86	21.23	8.14	Loser	13	M Vs.M	G Vs.R	G Vs.R and M Vs.M
13ºr2	Observed	With	Retreat	0	Male	Green	42.01	22.59	8.86	21.23	8.14	Loser	13	M Vs.M	G Vs.R	G Vs.R and M Vs.M
13ºr2	Observed	Without	Retreat	0	Male	Green	42.01	22.59	8.86	21.23	8.14	Loser	13	M Vs.M	G Vs.R	G Vs.R and M Vs.M
13ºr3	Non-observed	NA	NA	NA	Male	Red	51.58	29.79	13.3	17.74	8.38	Winner	13	M Vs.M	G Vs.R	G Vs.R and M Vs.M
13ºr3	Observed	Before	Approach	2	Male	Green	47.6	28.89	12.35	25.22	10.46	Loser	13	M Vs.M	G Vs.R	G Vs.R and M Vs.M
13ºr3	Observed	With	Approach	0	Male	Green	47.6	28.89	12.35	25.22	10.46	Loser	13	M Vs.M	G Vs.R	G Vs.R and M Vs.M
13ºr3	Observed	Without	Approach	2	Male	Green	47.6	28.89	12.35	25.22	10.46	Loser	13	M Vs.M	G Vs.R	G Vs.R and M Vs.M
13ºr3	Observed	Before	Attack	2	Male	Green	47.6	28.89	12.35	25.22	10.46	Loser	13	M Vs.M	G Vs.R	G Vs.R and M Vs.M
13ºr3	Observed	With	Attack	0	Male	Green	47.6	28.89	12.35	25.22	10.46	Loser	13	M Vs.M	G Vs.R	G Vs.R and M Vs.M
13ºr3	Observed	Without	Attack	0	Male	Green	47.6	28.89	12.35	25.22	10.46	Loser	13	M Vs.M	G Vs.R	G Vs.R and M Vs.M
13ºr3	Observed	Before	Retreat	1	Male	Green	47.6	28.89	12.35	25.22	10.46	Loser	13	M Vs.M	G Vs.R	G Vs.R and M Vs.M
13ºr3	Observed	With	Retreat	0	Male	Green	47.6	28.89	12.35	25.22	10.46	Loser	13	M Vs.M	G Vs.R	G Vs.R and M Vs.M
13ºr3	Observed	Without	Retreat	0	Male	Green	47.6	28.89	12.35	25.22	10.46	Loser	13	M Vs.M	G Vs.R	G Vs.R and M Vs.M
13ºr4	Non-observed	NA	NA	NA	Female	Green	43.29	21.21	9.01	22.31	8.36	Winner	13	M Vs.F	R Vs.G	R Vs.G and M Vs.F
13ºr4	Observed	Before	Approach	0	Male	Red	47.24	26.41	11.43	25.23	10.08	Loser	13	M Vs.F	R Vs.G	R Vs.G and M Vs.F
13ºr4	Observed	With	Approach	0	Male	Red	47.24	26.41	11.43	25.23	10.08	Loser	13	M Vs.F	R Vs.G	R Vs.G and M Vs.F
13ºr4	Observed	Without	Approach	6	Male	Red	47.24	26.41	11.43	25.23	10.08	Loser	13	M Vs.F	R Vs.G	R Vs.G and M Vs.F
13ºr4	Observed	Before	Attack	0	Male	Red	47.24	26.41	11.43	25.23	10.08	Loser	13	M Vs.F	R Vs.G	R Vs.G and M Vs.F
13ºr4	Observed	With	Attack	0	Male	Red	47.24	26.41	11.43	25.23	10.08	Loser	13	M Vs.F	R Vs.G	R Vs.G and M Vs.F
13ºr4	Observed	Without	Attack	0	Male	Red	47.24	26.41	11.43	25.23	10.08	Loser	13	M Vs.F	R Vs.G	R Vs.G and M Vs.F
13ºr4	Observed	Before	Retreat	0	Male	Red	47.24	26.41	11.43	25.23	10.08	Loser	13	M Vs.F	R Vs.G	R Vs.G and M Vs.F
13ºr4	Observed	With	Retreat	0	Male	Red	47.24	26.41	11.43	25.23	10.08	Loser	13	M Vs.F	R Vs.G	R Vs.G and M Vs.F
13ºr4	Observed	Without	Retreat	0	Male	Red	47.24	26.41	11.43	25.23	10.08	Loser	13	M Vs.F	R Vs.G	R Vs.G and M Vs.F
13ºr5	Non-observed	NA	NA	NA	Male	Green	36.77	22.37	8.36	22.67	8.37	Loser	13	F Vs.M	G Vs.G	G Vs.G and F Vs.M
13ºr5	Observed	Before	Approach	0	Female	Green	49.21	23.91	10.12	23.16	9	Winner	13	F Vs.M	G Vs.G	G Vs.G and F Vs.M
13ºr5	Observed	With	Approach	0	Female	Green	49.21	23.91	10.12	23.16	9	Winner	13	F Vs.M	G Vs.G	G Vs.G and F Vs.M
13ºr5	Observed	Without	Approach	0	Female	Green	49.21	23.91	10.12	23.16	9	Winner	13	F Vs.M	G Vs.G	G Vs.G and F Vs.M
13ºr5	Observed	Before	Attack	0	Female	Green	49.21	23.91	10.12	23.16	9	Winner	13	F Vs.M	G Vs.G	G Vs.G and F Vs.M
13ºr5	Observed	With	Attack	0	Female	Green	49.21	23.91	10.12	23.16	9	Winner	13	F Vs.M	G Vs.G	G Vs.G and F Vs.M
13ºr5	Observed	Without	Attack	0	Female	Green	49.21	23.91	10.12	23.16	9	Winner	13	F Vs.M	G Vs.G	G Vs.G and F Vs.M
13ºr5	Observed	Before	Retreat	0	Female	Green	49.21	23.91	10.12	23.16	9	Winner	13	F Vs.M	G Vs.G	G Vs.G and F Vs.M
13ºr5	Observed	With	Retreat	9	Female	Green	49.21	23.91	10.12	23.16	9	Winner	13	F Vs.M	G Vs.G	G Vs.G and F Vs.M
13ºr5	Observed	Without	Retreat	0	Female	Green	49.21	23.91	10.12	23.16	9	Winner	13	F Vs.M	G Vs.G	G Vs.G and F Vs.M
13ºr6	Non-observed	NA	NA	NA	Male	Green	43.44	23.82	9.54	20.7	9.03	Winner	13	M Vs.M	G Vs.G	G Vs.G and M Vs.M
13ºr6	Observed	Before	Approach	0	Male	Green	43.7	23.46	9.71	34.11	8.39	Loser	13	M Vs.M	G Vs.G	G Vs.G and M Vs.M
13ºr6	Observed	With	Approach	0	Male	Green	43.7	23.46	9.71	34.11	8.39	Loser	13	M Vs.M	G Vs.G	G Vs.G and M Vs.M
13ºr6	Observed	Without	Approach	5	Male	Green	43.7	23.46	9.71	34.11	8.39	Loser	13	M Vs.M	G Vs.G	G Vs.G and M Vs.M
13ºr6	Observed	Before	Attack	1	Male	Green	43.7	23.46	9.71	34.11	8.39	Loser	13	M Vs.M	G Vs.G	G Vs.G and M Vs.M
13ºr6	Observed	With	Attack	1	Male	Green	43.7	23.46	9.71	34.11	8.39	Loser	13	M Vs.M	G Vs.G	G Vs.G and M Vs.M
13ºr6	Observed	Without	Attack	4	Male	Green	43.7	23.46	9.71	34.11	8.39	Loser	13	M Vs.M	G Vs.G	G Vs.G and M Vs.M
13ºr6	Observed	Before	Retreat	1	Male	Green	43.7	23.46	9.71	34.11	8.39	Loser	13	M Vs.M	G Vs.G	G Vs.G and M Vs.M
13ºr6	Observed	With	Retreat	2	Male	Green	43.7	23.46	9.71	34.11	8.39	Loser	13	M Vs.M	G Vs.G	G Vs.G and M Vs.M
13ºr6	Observed	Without	Retreat	0	Male	Green	43.7	23.46	9.71	34.11	8.39	Loser	13	M Vs.M	G Vs.G	G Vs.G and M Vs.M
13ºr7	Non-observed	NA	NA	NA	Male	Green	42.8	22.53	9.74	20.85	8.04	Winner	13	F Vs.M	G Vs.G	G Vs.G and F Vs.M
13ºr7	Observed	Before	Approach	0	Female	Green	47.88	23.32	9.72	21.78	8.89	Loser	13	F Vs.M	G Vs.G	G Vs.G and F Vs.M
13ºr7	Observed	With	Approach	1	Female	Green	47.88	23.32	9.72	21.78	8.89	Loser	13	F Vs.M	G Vs.G	G Vs.G and F Vs.M
13ºr7	Observed	Without	Approach	4	Female	Green	47.88	23.32	9.72	21.78	8.89	Loser	13	F Vs.M	G Vs.G	G Vs.G and F Vs.M
13ºr7	Observed	Before	Attack	0	Female	Green	47.88	23.32	9.72	21.78	8.89	Loser	13	F Vs.M	G Vs.G	G Vs.G and F Vs.M
13ºr7	Observed	With	Attack	3	Female	Green	47.88	23.32	9.72	21.78	8.89	Loser	13	F Vs.M	G Vs.G	G Vs.G and F Vs.M
13ºr7	Observed	Without	Attack	8	Female	Green	47.88	23.32	9.72	21.78	8.89	Loser	13	F Vs.M	G Vs.G	G Vs.G and F Vs.M
13ºr7	Observed	Before	Retreat	0	Female	Green	47.88	23.32	9.72	21.78	8.89	Loser	13	F Vs.M	G Vs.G	G Vs.G and F Vs.M
13ºr7	Observed	With	Retreat	1	Female	Green	47.88	23.32	9.72	21.78	8.89	Loser	13	F Vs.M	G Vs.G	G Vs.G and F Vs.M
13ºr7	Observed	Without	Retreat	1	Female	Green	47.88	23.32	9.72	21.78	8.89	Loser	13	F Vs.M	G Vs.G	G Vs.G and F Vs.M
13ºr8	Non-observed	NA	NA	NA	Male	Green	41.89	21.47	9.52	21.33	8.57	Winner	13	F Vs.M	G Vs.G	G Vs.G and F Vs.M
13ºr8	Observed	Before	Approach	0	Female	Green	44.47	21.37	8.38	21.35	8.08	Loser	13	F Vs.M	G Vs.G	G Vs.G and F Vs.M
13ºr8	Observed	With	Approach	0	Female	Green	44.47	21.37	8.38	21.35	8.08	Loser	13	F Vs.M	G Vs.G	G Vs.G and F Vs.M
13ºr8	Observed	Without	Approach	2	Female	Green	44.47	21.37	8.38	21.35	8.08	Loser	13	F Vs.M	G Vs.G	G Vs.G and F Vs.M
13ºr8	Observed	Before	Attack	1	Female	Green	44.47	21.37	8.38	21.35	8.08	Loser	13	F Vs.M	G Vs.G	G Vs.G and F Vs.M
13ºr8	Observed	With	Attack	0	Female	Green	44.47	21.37	8.38	21.35	8.08	Loser	13	F Vs.M	G Vs.G	G Vs.G and F Vs.M
13ºr8	Observed	Without	Attack	1	Female	Green	44.47	21.37	8.38	21.35	8.08	Loser	13	F Vs.M	G Vs.G	G Vs.G and F Vs.M
13ºr8	Observed	Before	Retreat	0	Female	Green	44.47	21.37	8.38	21.35	8.08	Loser	13	F Vs.M	G Vs.G	G Vs.G and F Vs.M
13ºr8	Observed	With	Retreat	0	Female	Green	44.47	21.37	8.38	21.35	8.08	Loser	13	F Vs.M	G Vs.G	G Vs.G and F Vs.M
13ºr8	Observed	Without	Retreat	0	Female	Green	44.47	21.37	8.38	21.35	8.08	Loser	13	F Vs.M	G Vs.G	G Vs.G and F Vs.M
13ºr9	Non-observed	NA	NA	NA	Female	Green	42.55	21.1	8.36	16.17	6.24	Winner	13	M Vs.F	G Vs.G	G Vs.G and M Vs.F
13ºr9	Observed	Before	Approach	0	Male	Green	43.08	32.47	9.55	21.27	8.65	Loser	13	M Vs.F	G Vs.G	G Vs.G and M Vs.F
13ºr9	Observed	With	Approach	3	Male	Green	43.08	32.47	9.55	21.27	8.65	Loser	13	M Vs.F	G Vs.G	G Vs.G and M Vs.F
13ºr9	Observed	Without	Approach	3	Male	Green	43.08	32.47	9.55	21.27	8.65	Loser	13	M Vs.F	G Vs.G	G Vs.G and M Vs.F
13ºr9	Observed	Before	Attack	1	Male	Green	43.08	32.47	9.55	21.27	8.65	Loser	13	M Vs.F	G Vs.G	G Vs.G and M Vs.F
13ºr9	Observed	With	Attack	2	Male	Green	43.08	32.47	9.55	21.27	8.65	Loser	13	M Vs.F	G Vs.G	G Vs.G and M Vs.F
13ºr9	Observed	Without	Attack	1	Male	Green	43.08	32.47	9.55	21.27	8.65	Loser	13	M Vs.F	G Vs.G	G Vs.G and M Vs.F
13ºr9	Observed	Before	Retreat	0	Male	Green	43.08	32.47	9.55	21.27	8.65	Loser	13	M Vs.F	G Vs.G	G Vs.G and M Vs.F
13ºr9	Observed	With	Retreat	0	Male	Green	43.08	32.47	9.55	21.27	8.65	Loser	13	M Vs.F	G Vs.G	G Vs.G and M Vs.F
13ºr9	Observed	Without	Retreat	0	Male	Green	43.08	32.47	9.55	21.27	8.65	Loser	13	M Vs.F	G Vs.G	G Vs.G and M Vs.F
16ºr1	Non-observed	NA	NA	NA	Male	Green	42.79	23.38	9.53	21.09	8.55	Loser	16	M Vs.M	G Vs.G	G Vs.G and M Vs.M
16ºr1	Observed	Before	Approach	0	Male	Green	34.63	17.17	7.59	17.33	8.86	Winner	16	M Vs.M	G Vs.G	G Vs.G and M Vs.M
16ºr1	Observed	With	Approach	0	Male	Green	34.63	17.17	7.59	17.33	8.86	Winner	16	M Vs.M	G Vs.G	G Vs.G and M Vs.M
16ºr1	Observed	Without	Approach	0	Male	Green	34.63	17.17	7.59	17.33	8.86	Winner	16	M Vs.M	G Vs.G	G Vs.G and M Vs.M
16ºr1	Observed	Before	Attack	0	Male	Green	34.63	17.17	7.59	17.33	8.86	Winner	16	M Vs.M	G Vs.G	G Vs.G and M Vs.M
16ºr1	Observed	With	Attack	0	Male	Green	34.63	17.17	7.59	17.33	8.86	Winner	16	M Vs.M	G Vs.G	G Vs.G and M Vs.M
16ºr1	Observed	Without	Attack	0	Male	Green	34.63	17.17	7.59	17.33	8.86	Winner	16	M Vs.M	G Vs.G	G Vs.G and M Vs.M
16ºr1	Observed	Before	Retreat	0	Male	Green	34.63	17.17	7.59	17.33	8.86	Winner	16	M Vs.M	G Vs.G	G Vs.G and M Vs.M
16ºr1	Observed	With	Retreat	13	Male	Green	34.63	17.17	7.59	17.33	8.86	Winner	16	M Vs.M	G Vs.G	G Vs.G and M Vs.M
16ºr1	Observed	Without	Retreat	0	Male	Green	34.63	17.17	7.59	17.33	8.86	Winner	16	M Vs.M	G Vs.G	G Vs.G and M Vs.M
16ºr10	Non-observed	NA	NA	NA	Male	Green	47.02	25.63	10.06	25.18	9.6	Loser	16	M Vs.M	R Vs.G	R Vs.G and M Vs.M
16ºr10	Observed	Before	Approach	1	Male	Red	55.19	32.09	13.67	30.71	11.4	Winner	16	M Vs.M	R Vs.G	R Vs.G and M Vs.M
16ºr10	Observed	With	Approach	1	Male	Red	55.19	32.09	13.67	30.71	11.4	Winner	16	M Vs.M	R Vs.G	R Vs.G and M Vs.M
16ºr10	Observed	Without	Approach	4	Male	Red	55.19	32.09	13.67	30.71	11.4	Winner	16	M Vs.M	R Vs.G	R Vs.G and M Vs.M
16ºr10	Observed	Before	Attack	2	Male	Red	55.19	32.09	13.67	30.71	11.4	Winner	16	M Vs.M	R Vs.G	R Vs.G and M Vs.M
16ºr10	Observed	With	Attack	2	Male	Red	55.19	32.09	13.67	30.71	11.4	Winner	16	M Vs.M	R Vs.G	R Vs.G and M Vs.M
16ºr10	Observed	Without	Attack	2	Male	Red	55.19	32.09	13.67	30.71	11.4	Winner	16	M Vs.M	R Vs.G	R Vs.G and M Vs.M
16ºr10	Observed	Before	Retreat	0	Male	Red	55.19	32.09	13.67	30.71	11.4	Winner	16	M Vs.M	R Vs.G	R Vs.G and M Vs.M
16ºr10	Observed	With	Retreat	2	Male	Red	55.19	32.09	13.67	30.71	11.4	Winner	16	M Vs.M	R Vs.G	R Vs.G and M Vs.M
16ºr10	Observed	Without	Retreat	1	Male	Red	55.19	32.09	13.67	30.71	11.4	Winner	16	M Vs.M	R Vs.G	R Vs.G and M Vs.M
16ºr11	Non-observed	NA	NA	NA	Female	Green	39.06	20.12	8.12	18.87	7.07	Loser	16	M Vs.F	G Vs.G	G Vs.G and M Vs.F
16ºr11	Observed	Before	Approach	1	Male	Green	50.77	28.92	11.72	26.94	10.72	Winner	16	M Vs.F	G Vs.G	G Vs.G and M Vs.F
16ºr11	Observed	With	Approach	7	Male	Green	50.77	28.92	11.72	26.94	10.72	Winner	16	M Vs.F	G Vs.G	G Vs.G and M Vs.F
16ºr11	Observed	Without	Approach	3	Male	Green	50.77	28.92	11.72	26.94	10.72	Winner	16	M Vs.F	G Vs.G	G Vs.G and M Vs.F
16ºr11	Observed	Before	Attack	0	Male	Green	50.77	28.92	11.72	26.94	10.72	Winner	16	M Vs.F	G Vs.G	G Vs.G and M Vs.F
16ºr11	Observed	With	Attack	9	Male	Green	50.77	28.92	11.72	26.94	10.72	Winner	16	M Vs.F	G Vs.G	G Vs.G and M Vs.F
16ºr11	Observed	Without	Attack	1	Male	Green	50.77	28.92	11.72	26.94	10.72	Winner	16	M Vs.F	G Vs.G	G Vs.G and M Vs.F
16ºr11	Observed	Before	Retreat	0	Male	Green	50.77	28.92	11.72	26.94	10.72	Winner	16	M Vs.F	G Vs.G	G Vs.G and M Vs.F
16ºr11	Observed	With	Retreat	0	Male	Green	50.77	28.92	11.72	26.94	10.72	Winner	16	M Vs.F	G Vs.G	G Vs.G and M Vs.F
16ºr11	Observed	Without	Retreat	0	Male	Green	50.77	28.92	11.72	26.94	10.72	Winner	16	M Vs.F	G Vs.G	G Vs.G and M Vs.F
16ºr12	Non-observed	NA	NA	NA	Male	Green	39.5	20.28	8.79	20.69	7.67	Winner	16	M Vs.M	G Vs.G	G Vs.G and M Vs.M
16ºr12	Observed	Before	Approach	0	Male	Green	40.15	17.17	6.49	21.66	8.67	Loser	16	M Vs.M	G Vs.G	G Vs.G and M Vs.M
16ºr12	Observed	With	Approach	2	Male	Green	40.15	17.17	6.49	21.66	8.67	Loser	16	M Vs.M	G Vs.G	G Vs.G and M Vs.M
16ºr12	Observed	Without	Approach	8	Male	Green	40.15	17.17	6.49	21.66	8.67	Loser	16	M Vs.M	G Vs.G	G Vs.G and M Vs.M
16ºr12	Observed	Before	Attack	0	Male	Green	40.15	17.17	6.49	21.66	8.67	Loser	16	M Vs.M	G Vs.G	G Vs.G and M Vs.M
16ºr12	Observed	With	Attack	1	Male	Green	40.15	17.17	6.49	21.66	8.67	Loser	16	M Vs.M	G Vs.G	G Vs.G and M Vs.M
16ºr12	Observed	Without	Attack	12	Male	Green	40.15	17.17	6.49	21.66	8.67	Loser	16	M Vs.M	G Vs.G	G Vs.G and M Vs.M
16ºr12	Observed	Before	Retreat	0	Male	Green	40.15	17.17	6.49	21.66	8.67	Loser	16	M Vs.M	G Vs.G	G Vs.G and M Vs.M
16ºr12	Observed	With	Retreat	0	Male	Green	40.15	17.17	6.49	21.66	8.67	Loser	16	M Vs.M	G Vs.G	G Vs.G and M Vs.M
16ºr12	Observed	Without	Retreat	1	Male	Green	40.15	17.17	6.49	21.66	8.67	Loser	16	M Vs.M	G Vs.G	G Vs.G and M Vs.M
16ºr13	Non-observed	NA	NA	NA	Male	Green	43.8	24.36	10.03	23.44	8.92	Winner	16	F Vs.M	G Vs.G	G Vs.G and F Vs.M
16ºr13	Observed	Before	Approach	1	Female	Green	40.17	21.62	8.37	20.67	7.49	Loser	16	F Vs.M	G Vs.G	G Vs.G and F Vs.M
16ºr13	Observed	With	Approach	0	Female	Green	40.17	21.62	8.37	20.67	7.49	Loser	16	F Vs.M	G Vs.G	G Vs.G and F Vs.M
16ºr13	Observed	Without	Approach	9	Female	Green	40.17	21.62	8.37	20.67	7.49	Loser	16	F Vs.M	G Vs.G	G Vs.G and F Vs.M
16ºr13	Observed	Before	Attack	1	Female	Green	40.17	21.62	8.37	20.67	7.49	Loser	16	F Vs.M	G Vs.G	G Vs.G and F Vs.M
16ºr13	Observed	With	Attack	2	Female	Green	40.17	21.62	8.37	20.67	7.49	Loser	16	F Vs.M	G Vs.G	G Vs.G and F Vs.M
16ºr13	Observed	Without	Attack	16	Female	Green	40.17	21.62	8.37	20.67	7.49	Loser	16	F Vs.M	G Vs.G	G Vs.G and F Vs.M
16ºr13	Observed	Before	Retreat	0	Female	Green	40.17	21.62	8.37	20.67	7.49	Loser	16	F Vs.M	G Vs.G	G Vs.G and F Vs.M
16ºr13	Observed	With	Retreat	0	Female	Green	40.17	21.62	8.37	20.67	7.49	Loser	16	F Vs.M	G Vs.G	G Vs.G and F Vs.M
16ºr13	Observed	Without	Retreat	2	Female	Green	40.17	21.62	8.37	20.67	7.49	Loser	16	F Vs.M	G Vs.G	G Vs.G and F Vs.M
16ºr14	Non-observed	NA	NA	NA	Male	Red	47.6	26.48	9.87	26.57	11.06	Loser	16	M Vs.M	R Vs.R	R Vs.R and M Vs.M
16ºr14	Observed	Before	Approach	1	Male	Red	38.14	18.94	7.91	18.41	7	Winner	16	M Vs.M	R Vs.R	R Vs.R and M Vs.M
16ºr14	Observed	With	Approach	0	Male	Red	38.14	18.94	7.91	18.41	7	Winner	16	M Vs.M	R Vs.R	R Vs.R and M Vs.M
16ºr14	Observed	Without	Approach	3	Male	Red	38.14	18.94	7.91	18.41	7	Winner	16	M Vs.M	R Vs.R	R Vs.R and M Vs.M
16ºr14	Observed	Before	Attack	0	Male	Red	38.14	18.94	7.91	18.41	7	Winner	16	M Vs.M	R Vs.R	R Vs.R and M Vs.M
16ºr14	Observed	With	Attack	0	Male	Red	38.14	18.94	7.91	18.41	7	Winner	16	M Vs.M	R Vs.R	R Vs.R and M Vs.M
16ºr14	Observed	Without	Attack	1	Male	Red	38.14	18.94	7.91	18.41	7	Winner	16	M Vs.M	R Vs.R	R Vs.R and M Vs.M
16ºr14	Observed	Before	Retreat	0	Male	Red	38.14	18.94	7.91	18.41	7	Winner	16	M Vs.M	R Vs.R	R Vs.R and M Vs.M
16ºr14	Observed	With	Retreat	0	Male	Red	38.14	18.94	7.91	18.41	7	Winner	16	M Vs.M	R Vs.R	R Vs.R and M Vs.M
16ºr14	Observed	Without	Retreat	8	Male	Red	38.14	18.94	7.91	18.41	7	Winner	16	M Vs.M	R Vs.R	R Vs.R and M Vs.M
16ºr15	Non-observed	NA	NA	NA	Female	Green	44.64	21.85	8.56	23.12	7.91	Loser	16	M Vs.F	G Vs.G	G Vs.G and M Vs.F
16ºr15	Observed	Before	Approach	1	Male	Green	43.41	22.02	9.1	22.11	8.52	Winner	16	M Vs.F	G Vs.G	G Vs.G and M Vs.F
16ºr15	Observed	With	Approach	0	Male	Green	43.41	22.02	9.1	22.11	8.52	Winner	16	M Vs.F	G Vs.G	G Vs.G and M Vs.F
16ºr15	Observed	Without	Approach	0	Male	Green	43.41	22.02	9.1	22.11	8.52	Winner	16	M Vs.F	G Vs.G	G Vs.G and M Vs.F
16ºr15	Observed	Before	Attack	1	Male	Green	43.41	22.02	9.1	22.11	8.52	Winner	16	M Vs.F	G Vs.G	G Vs.G and M Vs.F
16ºr15	Observed	With	Attack	2	Male	Green	43.41	22.02	9.1	22.11	8.52	Winner	16	M Vs.F	G Vs.G	G Vs.G and M Vs.F
16ºr15	Observed	Without	Attack	11	Male	Green	43.41	22.02	9.1	22.11	8.52	Winner	16	M Vs.F	G Vs.G	G Vs.G and M Vs.F
16ºr15	Observed	Before	Retreat	0	Male	Green	43.41	22.02	9.1	22.11	8.52	Winner	16	M Vs.F	G Vs.G	G Vs.G and M Vs.F
16ºr15	Observed	With	Retreat	0	Male	Green	43.41	22.02	9.1	22.11	8.52	Winner	16	M Vs.F	G Vs.G	G Vs.G and M Vs.F
16ºr15	Observed	Without	Retreat	0	Male	Green	43.41	22.02	9.1	22.11	8.52	Winner	16	M Vs.F	G Vs.G	G Vs.G and M Vs.F
16ºr16	Non-observed	NA	NA	NA	Male	Green	36.06	19.26	7.96	18.92	6.94	Loser	16	M Vs.M	G Vs.G	G Vs.G and M Vs.M
16ºr16	Observed	Before	Approach	0	Male	Green	45.12	23.94	9.94	23.33	8.56	Winner	16	M Vs.M	G Vs.G	G Vs.G and M Vs.M
16ºr16	Observed	With	Approach	4	Male	Green	45.12	23.94	9.94	23.33	8.56	Winner	16	M Vs.M	G Vs.G	G Vs.G and M Vs.M
16ºr16	Observed	Without	Approach	0	Male	Green	45.12	23.94	9.94	23.33	8.56	Winner	16	M Vs.M	G Vs.G	G Vs.G and M Vs.M
16ºr16	Observed	Before	Attack	1	Male	Green	45.12	23.94	9.94	23.33	8.56	Winner	16	M Vs.M	G Vs.G	G Vs.G and M Vs.M
16ºr16	Observed	With	Attack	7	Male	Green	45.12	23.94	9.94	23.33	8.56	Winner	16	M Vs.M	G Vs.G	G Vs.G and M Vs.M
16ºr16	Observed	Without	Attack	0	Male	Green	45.12	23.94	9.94	23.33	8.56	Winner	16	M Vs.M	G Vs.G	G Vs.G and M Vs.M
16ºr16	Observed	Before	Retreat	0	Male	Green	45.12	23.94	9.94	23.33	8.56	Winner	16	M Vs.M	G Vs.G	G Vs.G and M Vs.M
16ºr16	Observed	With	Retreat	10	Male	Green	45.12	23.94	9.94	23.33	8.56	Winner	16	M Vs.M	G Vs.G	G Vs.G and M Vs.M
16ºr16	Observed	Without	Retreat	0	Male	Green	45.12	23.94	9.94	23.33	8.56	Winner	16	M Vs.M	G Vs.G	G Vs.G and M Vs.M
16ºr17	Non-observed	NA	NA	NA	Male	Green	41.01	21.45	8.95	20.67	8.03	Winner	16	F Vs.M	G Vs.G	G Vs.G and F Vs.M
16ºr17	Observed	Before	Approach	0	Female	Green	48.53	24.15	9.06	23.33	8.5	Loser	16	F Vs.M	G Vs.G	G Vs.G and F Vs.M
16ºr17	Observed	With	Approach	2	Female	Green	48.53	24.15	9.06	23.33	8.5	Loser	16	F Vs.M	G Vs.G	G Vs.G and F Vs.M
16ºr17	Observed	Without	Approach	13	Female	Green	48.53	24.15	9.06	23.33	8.5	Loser	16	F Vs.M	G Vs.G	G Vs.G and F Vs.M
16ºr17	Observed	Before	Attack	0	Female	Green	48.53	24.15	9.06	23.33	8.5	Loser	16	F Vs.M	G Vs.G	G Vs.G and F Vs.M
16ºr17	Observed	With	Attack	5	Female	Green	48.53	24.15	9.06	23.33	8.5	Loser	16	F Vs.M	G Vs.G	G Vs.G and F Vs.M
16ºr17	Observed	Without	Attack	10	Female	Green	48.53	24.15	9.06	23.33	8.5	Loser	16	F Vs.M	G Vs.G	G Vs.G and F Vs.M
16ºr17	Observed	Before	Retreat	0	Female	Green	48.53	24.15	9.06	23.33	8.5	Loser	16	F Vs.M	G Vs.G	G Vs.G and F Vs.M
16ºr17	Observed	With	Retreat	0	Female	Green	48.53	24.15	9.06	23.33	8.5	Loser	16	F Vs.M	G Vs.G	G Vs.G and F Vs.M
16ºr17	Observed	Without	Retreat	1	Female	Green	48.53	24.15	9.06	23.33	8.5	Loser	16	F Vs.M	G Vs.G	G Vs.G and F Vs.M
16ºr18	Non-observed	NA	NA	NA	Male	Green	40.84	22.65	9.28	16.67	6.1	Winner	16	M Vs.M	G Vs.G	G Vs.G and M Vs.M
16ºr18	Observed	Before	Approach	3	Male	Green	38.21	20.47	8.38	19.44	7.4	Winner	16	M Vs.M	G Vs.G	G Vs.G and M Vs.M
16ºr18	Observed	With	Approach	0	Male	Green	38.21	20.47	8.38	19.44	7.4	Winner	16	M Vs.M	G Vs.G	G Vs.G and M Vs.M
16ºr18	Observed	Without	Approach	0	Male	Green	38.21	20.47	8.38	19.44	7.4	Winner	16	M Vs.M	G Vs.G	G Vs.G and M Vs.M
16ºr18	Observed	Before	Attack	1	Male	Green	38.21	20.47	8.38	19.44	7.4	Winner	16	M Vs.M	G Vs.G	G Vs.G and M Vs.M
16ºr18	Observed	With	Attack	2	Male	Green	38.21	20.47	8.38	19.44	7.4	Winner	16	M Vs.M	G Vs.G	G Vs.G and M Vs.M
16ºr18	Observed	Without	Attack	0	Male	Green	38.21	20.47	8.38	19.44	7.4	Winner	16	M Vs.M	G Vs.G	G Vs.G and M Vs.M
16ºr18	Observed	Before	Retreat	3	Male	Green	38.21	20.47	8.38	19.44	7.4	Winner	16	M Vs.M	G Vs.G	G Vs.G and M Vs.M
16ºr18	Observed	With	Retreat	3	Male	Green	38.21	20.47	8.38	19.44	7.4	Winner	16	M Vs.M	G Vs.G	G Vs.G and M Vs.M
16ºr18	Observed	Without	Retreat	7	Male	Green	38.21	20.47	8.38	19.44	7.4	Winner	16	M Vs.M	G Vs.G	G Vs.G and M Vs.M
16ºr2	Non-observed	NA	NA	NA	Male	Red	52.09	29.65	12.85	18.8	7.83	Winner	16	M Vs.M	G Vs.R	G Vs.R and M Vs.M
16ºr2	Observed	Before	Approach	0	Male	Green	42.71	23.06	9.53	21.73	8.37	Loser	16	M Vs.M	G Vs.R	G Vs.R and M Vs.M
16ºr2	Observed	With	Approach	0	Male	Green	42.71	23.06	9.53	21.73	8.37	Loser	16	M Vs.M	G Vs.R	G Vs.R and M Vs.M
16ºr2	Observed	Without	Approach	6	Male	Green	42.71	23.06	9.53	21.73	8.37	Loser	16	M Vs.M	G Vs.R	G Vs.R and M Vs.M
16ºr2	Observed	Before	Attack	0	Male	Green	42.71	23.06	9.53	21.73	8.37	Loser	16	M Vs.M	G Vs.R	G Vs.R and M Vs.M
16ºr2	Observed	With	Attack	0	Male	Green	42.71	23.06	9.53	21.73	8.37	Loser	16	M Vs.M	G Vs.R	G Vs.R and M Vs.M
16ºr2	Observed	Without	Attack	0	Male	Green	42.71	23.06	9.53	21.73	8.37	Loser	16	M Vs.M	G Vs.R	G Vs.R and M Vs.M
16ºr2	Observed	Before	Retreat	0	Male	Green	42.71	23.06	9.53	21.73	8.37	Loser	16	M Vs.M	G Vs.R	G Vs.R and M Vs.M
16ºr2	Observed	With	Retreat	0	Male	Green	42.71	23.06	9.53	21.73	8.37	Loser	16	M Vs.M	G Vs.R	G Vs.R and M Vs.M
16ºr2	Observed	Without	Retreat	17	Male	Green	42.71	23.06	9.53	21.73	8.37	Loser	16	M Vs.M	G Vs.R	G Vs.R and M Vs.M
16ºr3	Non-observed	NA	NA	NA	Male	Green	37.49	20.14	8.72	17.92	6.68	Loser	16	M Vs.M	G Vs.G	G Vs.G and M Vs.M
16ºr3	Observed	Before	Approach	0	Male	Green	39.68	20.54	8.55	19.91	7.45	Winner	16	M Vs.M	G Vs.G	G Vs.G and M Vs.M
16ºr3	Observed	With	Approach	0	Male	Green	39.68	20.54	8.55	19.91	7.45	Winner	16	M Vs.M	G Vs.G	G Vs.G and M Vs.M
16ºr3	Observed	Without	Approach	0	Male	Green	39.68	20.54	8.55	19.91	7.45	Winner	16	M Vs.M	G Vs.G	G Vs.G and M Vs.M
16ºr3	Observed	Before	Attack	0	Male	Green	39.68	20.54	8.55	19.91	7.45	Winner	16	M Vs.M	G Vs.G	G Vs.G and M Vs.M
16ºr3	Observed	With	Attack	0	Male	Green	39.68	20.54	8.55	19.91	7.45	Winner	16	M Vs.M	G Vs.G	G Vs.G and M Vs.M
16ºr3	Observed	Without	Attack	0	Male	Green	39.68	20.54	8.55	19.91	7.45	Winner	16	M Vs.M	G Vs.G	G Vs.G and M Vs.M
16ºr3	Observed	Before	Retreat	2	Male	Green	39.68	20.54	8.55	19.91	7.45	Winner	16	M Vs.M	G Vs.G	G Vs.G and M Vs.M
16ºr3	Observed	With	Retreat	11	Male	Green	39.68	20.54	8.55	19.91	7.45	Winner	16	M Vs.M	G Vs.G	G Vs.G and M Vs.M
16ºr3	Observed	Without	Retreat	0	Male	Green	39.68	20.54	8.55	19.91	7.45	Winner	16	M Vs.M	G Vs.G	G Vs.G and M Vs.M
16ºr4	Non-observed	NA	NA	NA	Male	Green	48.4	27.56	11.66	25.46	10.05	Loser	16	M Vs.M	R Vs.G	R Vs.G and M Vs.M
16ºr4	Observed	Before	Approach	1	Male	Red	61.3	36.86	16.37	35.5	13.48	Winner	16	M Vs.M	R Vs.G	R Vs.G and M Vs.M
16ºr4	Observed	With	Approach	0	Male	Red	61.3	36.86	16.37	35.5	13.48	Winner	16	M Vs.M	R Vs.G	R Vs.G and M Vs.M
16ºr4	Observed	Without	Approach	4	Male	Red	61.3	36.86	16.37	35.5	13.48	Winner	16	M Vs.M	R Vs.G	R Vs.G and M Vs.M
16ºr4	Observed	Before	Attack	1	Male	Red	61.3	36.86	16.37	35.5	13.48	Winner	16	M Vs.M	R Vs.G	R Vs.G and M Vs.M
16ºr4	Observed	With	Attack	1	Male	Red	61.3	36.86	16.37	35.5	13.48	Winner	16	M Vs.M	R Vs.G	R Vs.G and M Vs.M
16ºr4	Observed	Without	Attack	3	Male	Red	61.3	36.86	16.37	35.5	13.48	Winner	16	M Vs.M	R Vs.G	R Vs.G and M Vs.M
16ºr4	Observed	Before	Retreat	0	Male	Red	61.3	36.86	16.37	35.5	13.48	Winner	16	M Vs.M	R Vs.G	R Vs.G and M Vs.M
16ºr4	Observed	With	Retreat	0	Male	Red	61.3	36.86	16.37	35.5	13.48	Winner	16	M Vs.M	R Vs.G	R Vs.G and M Vs.M
16ºr4	Observed	Without	Retreat	0	Male	Red	61.3	36.86	16.37	35.5	13.48	Winner	16	M Vs.M	R Vs.G	R Vs.G and M Vs.M
16ºr5	Non-observed	NA	NA	NA	Male	Green	39.83	22.83	9.22	21.88	8.25	Loser	16	M Vs.M	G Vs.G	G Vs.G and M Vs.M
16ºr5	Observed	Before	Approach	4	Male	Green	42.95	22	9.28	21.53	8.04	Winner	16	M Vs.M	G Vs.G	G Vs.G and M Vs.M
16ºr5	Observed	With	Approach	0	Male	Green	42.95	22	9.28	21.53	8.04	Winner	16	M Vs.M	G Vs.G	G Vs.G and M Vs.M
16ºr5	Observed	Without	Approach	2	Male	Green	42.95	22	9.28	21.53	8.04	Winner	16	M Vs.M	G Vs.G	G Vs.G and M Vs.M
16ºr5	Observed	Before	Attack	2	Male	Green	42.95	22	9.28	21.53	8.04	Winner	16	M Vs.M	G Vs.G	G Vs.G and M Vs.M
16ºr5	Observed	With	Attack	0	Male	Green	42.95	22	9.28	21.53	8.04	Winner	16	M Vs.M	G Vs.G	G Vs.G and M Vs.M
16ºr5	Observed	Without	Attack	1	Male	Green	42.95	22	9.28	21.53	8.04	Winner	16	M Vs.M	G Vs.G	G Vs.G and M Vs.M
16ºr5	Observed	Before	Retreat	2	Male	Green	42.95	22	9.28	21.53	8.04	Winner	16	M Vs.M	G Vs.G	G Vs.G and M Vs.M
16ºr5	Observed	With	Retreat	6	Male	Green	42.95	22	9.28	21.53	8.04	Winner	16	M Vs.M	G Vs.G	G Vs.G and M Vs.M
16ºr5	Observed	Without	Retreat	3	Male	Green	42.95	22	9.28	21.53	8.04	Winner	16	M Vs.M	G Vs.G	G Vs.G and M Vs.M
16ºr6	Non-observed	NA	NA	NA	Male	Green	46.19	24.67	9.39	24.3	8.28	Loser	16	M Vs.M	G Vs.G	G Vs.G and M Vs.M
16ºr6	Observed	Before	Approach	0	Male	Green	48.42	28.16	11.95	27.27	10	Winner	16	M Vs.M	G Vs.G	G Vs.G and M Vs.M
16ºr6	Observed	With	Approach	1	Male	Green	48.42	28.16	11.95	27.27	10	Winner	16	M Vs.M	G Vs.G	G Vs.G and M Vs.M
16ºr6	Observed	Without	Approach	1	Male	Green	48.42	28.16	11.95	27.27	10	Winner	16	M Vs.M	G Vs.G	G Vs.G and M Vs.M
16ºr6	Observed	Before	Attack	0	Male	Green	48.42	28.16	11.95	27.27	10	Winner	16	M Vs.M	G Vs.G	G Vs.G and M Vs.M
16ºr6	Observed	With	Attack	1	Male	Green	48.42	28.16	11.95	27.27	10	Winner	16	M Vs.M	G Vs.G	G Vs.G and M Vs.M
16ºr6	Observed	Without	Attack	4	Male	Green	48.42	28.16	11.95	27.27	10	Winner	16	M Vs.M	G Vs.G	G Vs.G and M Vs.M
16ºr6	Observed	Before	Retreat	0	Male	Green	48.42	28.16	11.95	27.27	10	Winner	16	M Vs.M	G Vs.G	G Vs.G and M Vs.M
16ºr6	Observed	With	Retreat	4	Male	Green	48.42	28.16	11.95	27.27	10	Winner	16	M Vs.M	G Vs.G	G Vs.G and M Vs.M
16ºr6	Observed	Without	Retreat	3	Male	Green	48.42	28.16	11.95	27.27	10	Winner	16	M Vs.M	G Vs.G	G Vs.G and M Vs.M
16ºr7	Non-observed	NA	NA	NA	Male	Red	50.66	28.31	11.3	27.47	10.15	Loser	16	M Vs.M	G Vs.R	G Vs.R and M Vs.M
16ºr7	Observed	Before	Approach	0	Male	Green	36.39	19.74	8.04	19.03	6.97	Winner	16	M Vs.M	G Vs.R	G Vs.R and M Vs.M
16ºr7	Observed	With	Approach	0	Male	Green	36.39	19.74	8.04	19.03	6.97	Winner	16	M Vs.M	G Vs.R	G Vs.R and M Vs.M
16ºr7	Observed	Without	Approach	0	Male	Green	36.39	19.74	8.04	19.03	6.97	Winner	16	M Vs.M	G Vs.R	G Vs.R and M Vs.M
16ºr7	Observed	Before	Attack	0	Male	Green	36.39	19.74	8.04	19.03	6.97	Winner	16	M Vs.M	G Vs.R	G Vs.R and M Vs.M
16ºr7	Observed	With	Attack	1	Male	Green	36.39	19.74	8.04	19.03	6.97	Winner	16	M Vs.M	G Vs.R	G Vs.R and M Vs.M
16ºr7	Observed	Without	Attack	0	Male	Green	36.39	19.74	8.04	19.03	6.97	Winner	16	M Vs.M	G Vs.R	G Vs.R and M Vs.M
16ºr7	Observed	Before	Retreat	1	Male	Green	36.39	19.74	8.04	19.03	6.97	Winner	16	M Vs.M	G Vs.R	G Vs.R and M Vs.M
16ºr7	Observed	With	Retreat	13	Male	Green	36.39	19.74	8.04	19.03	6.97	Winner	16	M Vs.M	G Vs.R	G Vs.R and M Vs.M
16ºr7	Observed	Without	Retreat	0	Male	Green	36.39	19.74	8.04	19.03	6.97	Winner	16	M Vs.M	G Vs.R	G Vs.R and M Vs.M
16ºr8	Non-observed	NA	NA	NA	Male	Green	45.46	22.66	8.46	23.95	8.4	Loser	16	M Vs.M	R Vs.G	R Vs.G and M Vs.M
16ºr8	Observed	Before	Approach	1	Male	Red	45.64	24.47	9.9	23.82	8.98	Winner	16	M Vs.M	R Vs.G	R Vs.G and M Vs.M
16ºr8	Observed	With	Approach	3	Male	Red	45.64	24.47	9.9	23.82	8.98	Winner	16	M Vs.M	R Vs.G	R Vs.G and M Vs.M
16ºr8	Observed	Without	Approach	8	Male	Red	45.64	24.47	9.9	23.82	8.98	Winner	16	M Vs.M	R Vs.G	R Vs.G and M Vs.M
16ºr8	Observed	Before	Attack	0	Male	Red	45.64	24.47	9.9	23.82	8.98	Winner	16	M Vs.M	R Vs.G	R Vs.G and M Vs.M
16ºr8	Observed	With	Attack	1	Male	Red	45.64	24.47	9.9	23.82	8.98	Winner	16	M Vs.M	R Vs.G	R Vs.G and M Vs.M
16ºr8	Observed	Without	Attack	0	Male	Red	45.64	24.47	9.9	23.82	8.98	Winner	16	M Vs.M	R Vs.G	R Vs.G and M Vs.M
16ºr8	Observed	Before	Retreat	0	Male	Red	45.64	24.47	9.9	23.82	8.98	Winner	16	M Vs.M	R Vs.G	R Vs.G and M Vs.M
16ºr8	Observed	With	Retreat	2	Male	Red	45.64	24.47	9.9	23.82	8.98	Winner	16	M Vs.M	R Vs.G	R Vs.G and M Vs.M
16ºr8	Observed	Without	Retreat	1	Male	Red	45.64	24.47	9.9	23.82	8.98	Winner	16	M Vs.M	R Vs.G	R Vs.G and M Vs.M
16ºr9	Non-observed	NA	NA	NA	Male	Green	40.57	23.52	9.51	21.49	8.19	Loser	16	M Vs.M	G Vs.G	G Vs.G and M Vs.M
16ºr9	Observed	Before	Approach	1	Male	Green	45.51	26.86	10.7	25.27	9.55	Winner	16	M Vs.M	G Vs.G	G Vs.G and M Vs.M
16ºr9	Observed	With	Approach	0	Male	Green	45.51	26.86	10.7	25.27	9.55	Winner	16	M Vs.M	G Vs.G	G Vs.G and M Vs.M
16ºr9	Observed	Without	Approach	2	Male	Green	45.51	26.86	10.7	25.27	9.55	Winner	16	M Vs.M	G Vs.G	G Vs.G and M Vs.M
16ºr9	Observed	Before	Attack	0	Male	Green	45.51	26.86	10.7	25.27	9.55	Winner	16	M Vs.M	G Vs.G	G Vs.G and M Vs.M
16ºr9	Observed	With	Attack	3	Male	Green	45.51	26.86	10.7	25.27	9.55	Winner	16	M Vs.M	G Vs.G	G Vs.G and M Vs.M
16ºr9	Observed	Without	Attack	0	Male	Green	45.51	26.86	10.7	25.27	9.55	Winner	16	M Vs.M	G Vs.G	G Vs.G and M Vs.M
16ºr9	Observed	Before	Retreat	0	Male	Green	45.51	26.86	10.7	25.27	9.55	Winner	16	M Vs.M	G Vs.G	G Vs.G and M Vs.M
16ºr9	Observed	With	Retreat	9	Male	Green	45.51	26.86	10.7	25.27	9.55	Winner	16	M Vs.M	G Vs.G	G Vs.G and M Vs.M
16ºr9	Observed	Without	Retreat	1	Male	Green	45.51	26.86	10.7	25.27	9.55	Winner	16	M Vs.M	G Vs.G	G Vs.G and M Vs.M
19ºr1	Non-observed	NA	NA	NA	Male	Green	40.59	22.34	8.78	21.87	8.03	Winner	19	M Vs.M	R Vs.G	R Vs.G and M Vs.M
19ºr1	Observed	Before	Approach	0	Male	Red	36.86	19.68	7.87	18.44	7.2	Loser	19	M Vs.M	R Vs.G	R Vs.G and M Vs.M
19ºr1	Observed	With	Approach	2	Male	Red	36.86	19.68	7.87	18.44	7.2	Loser	19	M Vs.M	R Vs.G	R Vs.G and M Vs.M
19ºr1	Observed	Without	Approach	1	Male	Red	36.86	19.68	7.87	18.44	7.2	Loser	19	M Vs.M	R Vs.G	R Vs.G and M Vs.M
19ºr1	Observed	Before	Attack	0	Male	Red	36.86	19.68	7.87	18.44	7.2	Loser	19	M Vs.M	R Vs.G	R Vs.G and M Vs.M
19ºr1	Observed	With	Attack	1	Male	Red	36.86	19.68	7.87	18.44	7.2	Loser	19	M Vs.M	R Vs.G	R Vs.G and M Vs.M
19ºr1	Observed	Without	Attack	1	Male	Red	36.86	19.68	7.87	18.44	7.2	Loser	19	M Vs.M	R Vs.G	R Vs.G and M Vs.M
19ºr1	Observed	Before	Retreat	0	Male	Red	36.86	19.68	7.87	18.44	7.2	Loser	19	M Vs.M	R Vs.G	R Vs.G and M Vs.M
19ºr1	Observed	With	Retreat	18	Male	Red	36.86	19.68	7.87	18.44	7.2	Loser	19	M Vs.M	R Vs.G	R Vs.G and M Vs.M
19ºr1	Observed	Without	Retreat	2	Male	Red	36.86	19.68	7.87	18.44	7.2	Loser	19	M Vs.M	R Vs.G	R Vs.G and M Vs.M
19ºr10	Non-observed	NA	NA	NA	Female	Green	35.27	20.84	6.88	19.41	6.49	Winner	19	M Vs.F	R Vs.G	R Vs.G and M Vs.F
19ºr10	Observed	Before	Approach	1	Male	Red	38.66	19.12	7.51	18.68	7.75	Loser	19	M Vs.F	R Vs.G	R Vs.G and M Vs.F
19ºr10	Observed	With	Approach	0	Male	Red	38.66	19.12	7.51	18.68	7.75	Loser	19	M Vs.F	R Vs.G	R Vs.G and M Vs.F
19ºr10	Observed	Without	Approach	0	Male	Red	38.66	19.12	7.51	18.68	7.75	Loser	19	M Vs.F	R Vs.G	R Vs.G and M Vs.F
19ºr10	Observed	Before	Attack	2	Male	Red	38.66	19.12	7.51	18.68	7.75	Loser	19	M Vs.F	R Vs.G	R Vs.G and M Vs.F
19ºr10	Observed	With	Attack	0	Male	Red	38.66	19.12	7.51	18.68	7.75	Loser	19	M Vs.F	R Vs.G	R Vs.G and M Vs.F
19ºr10	Observed	Without	Attack	0	Male	Red	38.66	19.12	7.51	18.68	7.75	Loser	19	M Vs.F	R Vs.G	R Vs.G and M Vs.F
19ºr10	Observed	Before	Retreat	2	Male	Red	38.66	19.12	7.51	18.68	7.75	Loser	19	M Vs.F	R Vs.G	R Vs.G and M Vs.F
19ºr10	Observed	With	Retreat	0	Male	Red	38.66	19.12	7.51	18.68	7.75	Loser	19	M Vs.F	R Vs.G	R Vs.G and M Vs.F
19ºr10	Observed	Without	Retreat	0	Male	Red	38.66	19.12	7.51	18.68	7.75	Loser	19	M Vs.F	R Vs.G	R Vs.G and M Vs.F
19ºr11	Non-observed	NA	NA	NA	Male	Green	41.54	21.94	9.2	20.93	8.13	Loser	19	M Vs.M	G Vs.G	G Vs.G and M Vs.M
19ºr11	Observed	Before	Approach	1	Male	Green	37.21	20.15	8.61	17.78	6.82	Winner	19	M Vs.M	G Vs.G	G Vs.G and M Vs.M
19ºr11	Observed	With	Approach	0	Male	Green	37.21	20.15	8.61	17.78	6.82	Winner	19	M Vs.M	G Vs.G	G Vs.G and M Vs.M
19ºr11	Observed	Without	Approach	4	Male	Green	37.21	20.15	8.61	17.78	6.82	Winner	19	M Vs.M	G Vs.G	G Vs.G and M Vs.M
19ºr11	Observed	Before	Attack	0	Male	Green	37.21	20.15	8.61	17.78	6.82	Winner	19	M Vs.M	G Vs.G	G Vs.G and M Vs.M
19ºr11	Observed	With	Attack	0	Male	Green	37.21	20.15	8.61	17.78	6.82	Winner	19	M Vs.M	G Vs.G	G Vs.G and M Vs.M
19ºr11	Observed	Without	Attack	0	Male	Green	37.21	20.15	8.61	17.78	6.82	Winner	19	M Vs.M	G Vs.G	G Vs.G and M Vs.M
19ºr11	Observed	Before	Retreat	0	Male	Green	37.21	20.15	8.61	17.78	6.82	Winner	19	M Vs.M	G Vs.G	G Vs.G and M Vs.M
19ºr11	Observed	With	Retreat	3	Male	Green	37.21	20.15	8.61	17.78	6.82	Winner	19	M Vs.M	G Vs.G	G Vs.G and M Vs.M
19ºr11	Observed	Without	Retreat	2	Male	Green	37.21	20.15	8.61	17.78	6.82	Winner	19	M Vs.M	G Vs.G	G Vs.G and M Vs.M
19ºr12	Non-observed	NA	NA	NA	Male	Green	42.71	19.25	7.09	21.01	8.22	Winner	19	F Vs.M	G Vs.G	G Vs.G and F Vs.M
19ºr12	Observed	Before	Approach	3	Female	Green	41.43	20.77	9	21.42	7.7	Loser	19	F Vs.M	G Vs.G	G Vs.G and F Vs.M
19ºr12	Observed	With	Approach	0	Female	Green	41.43	20.77	9	21.42	7.7	Loser	19	F Vs.M	G Vs.G	G Vs.G and F Vs.M
19ºr12	Observed	Without	Approach	6	Female	Green	41.43	20.77	9	21.42	7.7	Loser	19	F Vs.M	G Vs.G	G Vs.G and F Vs.M
19ºr12	Observed	Before	Attack	6	Female	Green	41.43	20.77	9	21.42	7.7	Loser	19	F Vs.M	G Vs.G	G Vs.G and F Vs.M
19ºr12	Observed	With	Attack	0	Female	Green	41.43	20.77	9	21.42	7.7	Loser	19	F Vs.M	G Vs.G	G Vs.G and F Vs.M
19ºr12	Observed	Without	Attack	7	Female	Green	41.43	20.77	9	21.42	7.7	Loser	19	F Vs.M	G Vs.G	G Vs.G and F Vs.M
19ºr12	Observed	Before	Retreat	4	Female	Green	41.43	20.77	9	21.42	7.7	Loser	19	F Vs.M	G Vs.G	G Vs.G and F Vs.M
19ºr12	Observed	With	Retreat	0	Female	Green	41.43	20.77	9	21.42	7.7	Loser	19	F Vs.M	G Vs.G	G Vs.G and F Vs.M
19ºr12	Observed	Without	Retreat	1	Female	Green	41.43	20.77	9	21.42	7.7	Loser	19	F Vs.M	G Vs.G	G Vs.G and F Vs.M
19ºr13	Non-observed	NA	NA	NA	Male	Green	40.27	22.92	9.5	17.79	6.43	Loser	19	F Vs.M	G Vs.G	G Vs.G and F Vs.M
19ºr13	Observed	Before	Approach	2	Female	Green	47.51	23.17	9.73	23.24	8.82	Winner	19	F Vs.M	G Vs.G	G Vs.G and F Vs.M
19ºr13	Observed	With	Approach	0	Female	Green	47.51	23.17	9.73	23.24	8.82	Winner	19	F Vs.M	G Vs.G	G Vs.G and F Vs.M
19ºr13	Observed	Without	Approach	0	Female	Green	47.51	23.17	9.73	23.24	8.82	Winner	19	F Vs.M	G Vs.G	G Vs.G and F Vs.M
19ºr13	Observed	Before	Attack	3	Female	Green	47.51	23.17	9.73	23.24	8.82	Winner	19	F Vs.M	G Vs.G	G Vs.G and F Vs.M
19ºr13	Observed	With	Attack	0	Female	Green	47.51	23.17	9.73	23.24	8.82	Winner	19	F Vs.M	G Vs.G	G Vs.G and F Vs.M
19ºr13	Observed	Without	Attack	0	Female	Green	47.51	23.17	9.73	23.24	8.82	Winner	19	F Vs.M	G Vs.G	G Vs.G and F Vs.M
19ºr13	Observed	Before	Retreat	0	Female	Green	47.51	23.17	9.73	23.24	8.82	Winner	19	F Vs.M	G Vs.G	G Vs.G and F Vs.M
19ºr13	Observed	With	Retreat	8	Female	Green	47.51	23.17	9.73	23.24	8.82	Winner	19	F Vs.M	G Vs.G	G Vs.G and F Vs.M
19ºr13	Observed	Without	Retreat	0	Female	Green	47.51	23.17	9.73	23.24	8.82	Winner	19	F Vs.M	G Vs.G	G Vs.G and F Vs.M
19ºr14	Non-observed	NA	NA	NA	Female	Green	40.73	23.24	8.7	22.19	8.23	Winner	19	M Vs.F	R Vs.G	R Vs.G and M Vs.F
19ºr14	Observed	Before	Approach	5	Male	Red	60.76	35.22	15.84	33.82	13.36	Loser	19	M Vs.F	R Vs.G	R Vs.G and M Vs.F
19ºr14	Observed	With	Approach	0	Male	Red	60.76	35.22	15.84	33.82	13.36	Loser	19	M Vs.F	R Vs.G	R Vs.G and M Vs.F
19ºr14	Observed	Without	Approach	3	Male	Red	60.76	35.22	15.84	33.82	13.36	Loser	19	M Vs.F	R Vs.G	R Vs.G and M Vs.F
19ºr14	Observed	Before	Attack	7	Male	Red	60.76	35.22	15.84	33.82	13.36	Loser	19	M Vs.F	R Vs.G	R Vs.G and M Vs.F
19ºr14	Observed	With	Attack	0	Male	Red	60.76	35.22	15.84	33.82	13.36	Loser	19	M Vs.F	R Vs.G	R Vs.G and M Vs.F
19ºr14	Observed	Without	Attack	3	Male	Red	60.76	35.22	15.84	33.82	13.36	Loser	19	M Vs.F	R Vs.G	R Vs.G and M Vs.F
19ºr14	Observed	Before	Retreat	0	Male	Red	60.76	35.22	15.84	33.82	13.36	Loser	19	M Vs.F	R Vs.G	R Vs.G and M Vs.F
19ºr14	Observed	With	Retreat	0	Male	Red	60.76	35.22	15.84	33.82	13.36	Loser	19	M Vs.F	R Vs.G	R Vs.G and M Vs.F
19ºr14	Observed	Without	Retreat	0	Male	Red	60.76	35.22	15.84	33.82	13.36	Loser	19	M Vs.F	R Vs.G	R Vs.G and M Vs.F
19ºr15	Non-observed	NA	NA	NA	Male	Red	47.73	26.83	10.23	27.15	11.69	Loser	19	M Vs.M	G Vs.R	G Vs.R and M Vs.M
19ºr15	Observed	Before	Approach	0	Male	Green	49.12	20.42	8.58	20.19	7.76	Winner	19	M Vs.M	G Vs.R	G Vs.R and M Vs.M
19ºr15	Observed	With	Approach	0	Male	Green	49.12	20.42	8.58	20.19	7.76	Winner	19	M Vs.M	G Vs.R	G Vs.R and M Vs.M
19ºr15	Observed	Without	Approach	3	Male	Green	49.12	20.42	8.58	20.19	7.76	Winner	19	M Vs.M	G Vs.R	G Vs.R and M Vs.M
19ºr15	Observed	Before	Attack	0	Male	Green	49.12	20.42	8.58	20.19	7.76	Winner	19	M Vs.M	G Vs.R	G Vs.R and M Vs.M
19ºr15	Observed	With	Attack	0	Male	Green	49.12	20.42	8.58	20.19	7.76	Winner	19	M Vs.M	G Vs.R	G Vs.R and M Vs.M
19ºr15	Observed	Without	Attack	1	Male	Green	49.12	20.42	8.58	20.19	7.76	Winner	19	M Vs.M	G Vs.R	G Vs.R and M Vs.M
19ºr15	Observed	Before	Retreat	0	Male	Green	49.12	20.42	8.58	20.19	7.76	Winner	19	M Vs.M	G Vs.R	G Vs.R and M Vs.M
19ºr15	Observed	With	Retreat	3	Male	Green	49.12	20.42	8.58	20.19	7.76	Winner	19	M Vs.M	G Vs.R	G Vs.R and M Vs.M
19ºr15	Observed	Without	Retreat	0	Male	Green	49.12	20.42	8.58	20.19	7.76	Winner	19	M Vs.M	G Vs.R	G Vs.R and M Vs.M
19ºr16	Non-observed	NA	NA	NA	Male	Green	36.01	18.62	7.14	17.78	6.66	Loser	19	M Vs.M	R Vs.G	R Vs.G and M Vs.M
19ºr16	Observed	Before	Approach	2	Male	Red	45.63	24.23	10.19	24.46	9.01	Loser	19	M Vs.M	R Vs.G	R Vs.G and M Vs.M
19ºr16	Observed	With	Approach	0	Male	Red	45.63	24.23	10.19	24.46	9.01	Loser	19	M Vs.M	R Vs.G	R Vs.G and M Vs.M
19ºr16	Observed	Without	Approach	0	Male	Red	45.63	24.23	10.19	24.46	9.01	Loser	19	M Vs.M	R Vs.G	R Vs.G and M Vs.M
19ºr16	Observed	Before	Attack	3	Male	Red	45.63	24.23	10.19	24.46	9.01	Loser	19	M Vs.M	R Vs.G	R Vs.G and M Vs.M
19ºr16	Observed	With	Attack	0	Male	Red	45.63	24.23	10.19	24.46	9.01	Loser	19	M Vs.M	R Vs.G	R Vs.G and M Vs.M
19ºr16	Observed	Without	Attack	0	Male	Red	45.63	24.23	10.19	24.46	9.01	Loser	19	M Vs.M	R Vs.G	R Vs.G and M Vs.M
19ºr16	Observed	Before	Retreat	0	Male	Red	45.63	24.23	10.19	24.46	9.01	Loser	19	M Vs.M	R Vs.G	R Vs.G and M Vs.M
19ºr16	Observed	With	Retreat	0	Male	Red	45.63	24.23	10.19	24.46	9.01	Loser	19	M Vs.M	R Vs.G	R Vs.G and M Vs.M
19ºr16	Observed	Without	Retreat	0	Male	Red	45.63	24.23	10.19	24.46	9.01	Loser	19	M Vs.M	R Vs.G	R Vs.G and M Vs.M
19ºr2	Non-observed	NA	NA	NA	Male	Red	42.05	22.28	9.06	21.51	8.15	Loser	19	M Vs.M	R Vs.R	R Vs.R and M Vs.M
19ºr2	Observed	Before	Approach	3	Male	Red	46.44	26.29	11.39	24.7	9.91	Winner	19	M Vs.M	R Vs.R	R Vs.R and M Vs.M
19ºr2	Observed	With	Approach	0	Male	Red	46.44	26.29	11.39	24.7	9.91	Winner	19	M Vs.M	R Vs.R	R Vs.R and M Vs.M
19ºr2	Observed	Without	Approach	3	Male	Red	46.44	26.29	11.39	24.7	9.91	Winner	19	M Vs.M	R Vs.R	R Vs.R and M Vs.M
19ºr2	Observed	Before	Attack	3	Male	Red	46.44	26.29	11.39	24.7	9.91	Winner	19	M Vs.M	R Vs.R	R Vs.R and M Vs.M
19ºr2	Observed	With	Attack	1	Male	Red	46.44	26.29	11.39	24.7	9.91	Winner	19	M Vs.M	R Vs.R	R Vs.R and M Vs.M
19ºr2	Observed	Without	Attack	1	Male	Red	46.44	26.29	11.39	24.7	9.91	Winner	19	M Vs.M	R Vs.R	R Vs.R and M Vs.M
19ºr2	Observed	Before	Retreat	2	Male	Red	46.44	26.29	11.39	24.7	9.91	Winner	19	M Vs.M	R Vs.R	R Vs.R and M Vs.M
19ºr2	Observed	With	Retreat	6	Male	Red	46.44	26.29	11.39	24.7	9.91	Winner	19	M Vs.M	R Vs.R	R Vs.R and M Vs.M
19ºr2	Observed	Without	Retreat	0	Male	Red	46.44	26.29	11.39	24.7	9.91	Winner	19	M Vs.M	R Vs.R	R Vs.R and M Vs.M
19ºr3	Non-observed	NA	NA	NA	Female	Green	43.01	19.06	8.23	16.2	6.09	Loser	19	F Vs.F	G Vs.G	G Vs.G and F Vs.F
19ºr3	Observed	Before	Approach	0	Female	Green	44.46	21.94	8.93	21.05	8.11	Winner	19	F Vs.F	G Vs.G	G Vs.G and F Vs.F
19ºr3	Observed	With	Approach	0	Female	Green	44.46	21.94	8.93	21.05	8.11	Winner	19	F Vs.F	G Vs.G	G Vs.G and F Vs.F
19ºr3	Observed	Without	Approach	2	Female	Green	44.46	21.94	8.93	21.05	8.11	Winner	19	F Vs.F	G Vs.G	G Vs.G and F Vs.F
19ºr3	Observed	Before	Attack	0	Female	Green	44.46	21.94	8.93	21.05	8.11	Winner	19	F Vs.F	G Vs.G	G Vs.G and F Vs.F
19ºr3	Observed	With	Attack	1	Female	Green	44.46	21.94	8.93	21.05	8.11	Winner	19	F Vs.F	G Vs.G	G Vs.G and F Vs.F
19ºr3	Observed	Without	Attack	3	Female	Green	44.46	21.94	8.93	21.05	8.11	Winner	19	F Vs.F	G Vs.G	G Vs.G and F Vs.F
19ºr3	Observed	Before	Retreat	0	Female	Green	44.46	21.94	8.93	21.05	8.11	Winner	19	F Vs.F	G Vs.G	G Vs.G and F Vs.F
19ºr3	Observed	With	Retreat	2	Female	Green	44.46	21.94	8.93	21.05	8.11	Winner	19	F Vs.F	G Vs.G	G Vs.G and F Vs.F
19ºr3	Observed	Without	Retreat	7	Female	Green	44.46	21.94	8.93	21.05	8.11	Winner	19	F Vs.F	G Vs.G	G Vs.G and F Vs.F
19ºr4	Non-observed	NA	NA	NA	Male	Red	43.5	22.53	9.13	23.59	8.42	Winner	19	F Vs.M	G Vs.R	G Vs.R and F Vs.M
19ºr4	Observed	Before	Approach	3	Female	Green	49.75	35.67	9.92	34.02	8.96	Loser	19	F Vs.M	G Vs.R	G Vs.R and F Vs.M
19ºr4	Observed	With	Approach	0	Female	Green	49.75	35.67	9.92	34.02	8.96	Loser	19	F Vs.M	G Vs.R	G Vs.R and F Vs.M
19ºr4	Observed	Without	Approach	1	Female	Green	49.75	35.67	9.92	34.02	8.96	Loser	19	F Vs.M	G Vs.R	G Vs.R and F Vs.M
19ºr4	Observed	Before	Attack	11	Female	Green	49.75	35.67	9.92	34.02	8.96	Loser	19	F Vs.M	G Vs.R	G Vs.R and F Vs.M
19ºr4	Observed	With	Attack	2	Female	Green	49.75	35.67	9.92	34.02	8.96	Loser	19	F Vs.M	G Vs.R	G Vs.R and F Vs.M
19ºr4	Observed	Without	Attack	0	Female	Green	49.75	35.67	9.92	34.02	8.96	Loser	19	F Vs.M	G Vs.R	G Vs.R and F Vs.M
19ºr4	Observed	Before	Retreat	7	Female	Green	49.75	35.67	9.92	34.02	8.96	Loser	19	F Vs.M	G Vs.R	G Vs.R and F Vs.M
19ºr4	Observed	With	Retreat	2	Female	Green	49.75	35.67	9.92	34.02	8.96	Loser	19	F Vs.M	G Vs.R	G Vs.R and F Vs.M
19ºr4	Observed	Without	Retreat	5	Female	Green	49.75	35.67	9.92	34.02	8.96	Loser	19	F Vs.M	G Vs.R	G Vs.R and F Vs.M
19ºr5	Non-observed	NA	NA	NA	Male	Red	46.21	27.56	11.66	26.58	9.6	Winner	19	M Vs.M	G Vs.R	G Vs.R and M Vs.M
19ºr5	Observed	Before	Approach	0	Male	Green	42.72	21.63	9.6	22.24	8.29	Loser	19	M Vs.M	G Vs.R	G Vs.R and M Vs.M
19ºr5	Observed	With	Approach	0	Male	Green	42.72	21.63	9.6	22.24	8.29	Loser	19	M Vs.M	G Vs.R	G Vs.R and M Vs.M
19ºr5	Observed	Without	Approach	3	Male	Green	42.72	21.63	9.6	22.24	8.29	Loser	19	M Vs.M	G Vs.R	G Vs.R and M Vs.M
19ºr5	Observed	Before	Attack	2	Male	Green	42.72	21.63	9.6	22.24	8.29	Loser	19	M Vs.M	G Vs.R	G Vs.R and M Vs.M
19ºr5	Observed	With	Attack	0	Male	Green	42.72	21.63	9.6	22.24	8.29	Loser	19	M Vs.M	G Vs.R	G Vs.R and M Vs.M
19ºr5	Observed	Without	Attack	7	Male	Green	42.72	21.63	9.6	22.24	8.29	Loser	19	M Vs.M	G Vs.R	G Vs.R and M Vs.M
19ºr5	Observed	Before	Retreat	3	Male	Green	42.72	21.63	9.6	22.24	8.29	Loser	19	M Vs.M	G Vs.R	G Vs.R and M Vs.M
19ºr5	Observed	With	Retreat	13	Male	Green	42.72	21.63	9.6	22.24	8.29	Loser	19	M Vs.M	G Vs.R	G Vs.R and M Vs.M
19ºr5	Observed	Without	Retreat	1	Male	Green	42.72	21.63	9.6	22.24	8.29	Loser	19	M Vs.M	G Vs.R	G Vs.R and M Vs.M
19ºr6	Non-observed	NA	NA	NA	Male	Red	39.2	20.84	8.35	20.65	7.52	Winner	19	M Vs.M	G Vs.R	G Vs.R and M Vs.M
19ºr6	Observed	Before	Approach	4	Male	Green	44.55	21.44	8.77	23.22	8.98	Loser	19	M Vs.M	G Vs.R	G Vs.R and M Vs.M
19ºr6	Observed	With	Approach	7	Male	Green	44.55	21.44	8.77	23.22	8.98	Loser	19	M Vs.M	G Vs.R	G Vs.R and M Vs.M
19ºr6	Observed	Without	Approach	2	Male	Green	44.55	21.44	8.77	23.22	8.98	Loser	19	M Vs.M	G Vs.R	G Vs.R and M Vs.M
19ºr6	Observed	Before	Attack	6	Male	Green	44.55	21.44	8.77	23.22	8.98	Loser	19	M Vs.M	G Vs.R	G Vs.R and M Vs.M
19ºr6	Observed	With	Attack	6	Male	Green	44.55	21.44	8.77	23.22	8.98	Loser	19	M Vs.M	G Vs.R	G Vs.R and M Vs.M
19ºr6	Observed	Without	Attack	9	Male	Green	44.55	21.44	8.77	23.22	8.98	Loser	19	M Vs.M	G Vs.R	G Vs.R and M Vs.M
19ºr6	Observed	Before	Retreat	0	Male	Green	44.55	21.44	8.77	23.22	8.98	Loser	19	M Vs.M	G Vs.R	G Vs.R and M Vs.M
19ºr6	Observed	With	Retreat	5	Male	Green	44.55	21.44	8.77	23.22	8.98	Loser	19	M Vs.M	G Vs.R	G Vs.R and M Vs.M
19ºr6	Observed	Without	Retreat	0	Male	Green	44.55	21.44	8.77	23.22	8.98	Loser	19	M Vs.M	G Vs.R	G Vs.R and M Vs.M
19ºr7	Non-observed	NA	NA	NA	Male	Red	53.45	NA	NA	31.01	11.37	Loser	19	M Vs.M	R Vs.R	R Vs.R and M Vs.M
19ºr7	Observed	Before	Approach	2	Male	Red	44.25	24.14	9.65	23.46	8.56	Winner	19	M Vs.M	R Vs.R	R Vs.R and M Vs.M
19ºr7	Observed	With	Approach	0	Male	Red	44.25	24.14	9.65	23.46	8.56	Winner	19	M Vs.M	R Vs.R	R Vs.R and M Vs.M
19ºr7	Observed	Without	Approach	3	Male	Red	44.25	24.14	9.65	23.46	8.56	Winner	19	M Vs.M	R Vs.R	R Vs.R and M Vs.M
19ºr7	Observed	Before	Attack	2	Male	Red	44.25	24.14	9.65	23.46	8.56	Winner	19	M Vs.M	R Vs.R	R Vs.R and M Vs.M
19ºr7	Observed	With	Attack	1	Male	Red	44.25	24.14	9.65	23.46	8.56	Winner	19	M Vs.M	R Vs.R	R Vs.R and M Vs.M
19ºr7	Observed	Without	Attack	2	Male	Red	44.25	24.14	9.65	23.46	8.56	Winner	19	M Vs.M	R Vs.R	R Vs.R and M Vs.M
19ºr7	Observed	Before	Retreat	2	Male	Red	44.25	24.14	9.65	23.46	8.56	Winner	19	M Vs.M	R Vs.R	R Vs.R and M Vs.M
19ºr7	Observed	With	Retreat	2	Male	Red	44.25	24.14	9.65	23.46	8.56	Winner	19	M Vs.M	R Vs.R	R Vs.R and M Vs.M
19ºr7	Observed	Without	Retreat	4	Male	Red	44.25	24.14	9.65	23.46	8.56	Winner	19	M Vs.M	R Vs.R	R Vs.R and M Vs.M
19ºr8	Non-observed	NA	NA	NA	Male	Green	48.89	27.81	11.69	26.32	10.08	Loser	19	F Vs.M	R Vs.G	R Vs.G and F Vs.M
19ºr8	Observed	Before	Approach	2	Female	Red	44.83	20.87	8.86	NA	NA	Winner	19	F Vs.M	R Vs.G	R Vs.G and F Vs.M
19ºr8	Observed	With	Approach	0	Female	Red	44.83	20.87	8.86	NA	NA	Winner	19	F Vs.M	R Vs.G	R Vs.G and F Vs.M
19ºr8	Observed	Without	Approach	0	Female	Red	44.83	20.87	8.86	NA	NA	Winner	19	F Vs.M	R Vs.G	R Vs.G and F Vs.M
19ºr8	Observed	Before	Attack	0	Female	Red	44.83	20.87	8.86	NA	NA	Winner	19	F Vs.M	R Vs.G	R Vs.G and F Vs.M
19ºr8	Observed	With	Attack	0	Female	Red	44.83	20.87	8.86	NA	NA	Winner	19	F Vs.M	R Vs.G	R Vs.G and F Vs.M
19ºr8	Observed	Without	Attack	0	Female	Red	44.83	20.87	8.86	NA	NA	Winner	19	F Vs.M	R Vs.G	R Vs.G and F Vs.M
19ºr8	Observed	Before	Retreat	3	Female	Red	44.83	20.87	8.86	NA	NA	Winner	19	F Vs.M	R Vs.G	R Vs.G and F Vs.M
19ºr8	Observed	With	Retreat	7	Female	Red	44.83	20.87	8.86	NA	NA	Winner	19	F Vs.M	R Vs.G	R Vs.G and F Vs.M
19ºr8	Observed	Without	Retreat	0	Female	Red	44.83	20.87	8.86	NA	NA	Winner	19	F Vs.M	R Vs.G	R Vs.G and F Vs.M
19ºr9	Non-observed	NA	NA	NA	Male	Green	37.38	20.78	7.58	19.43	7.55	Winner	19	M Vs.M	G Vs.G	G Vs.G and M Vs.M
19ºr9	Observed	Before	Approach	7	Male	Green	40.08	20.7	8.27	20.19	7.57	Loser	19	M Vs.M	G Vs.G	G Vs.G and M Vs.M
19ºr9	Observed	With	Approach	0	Male	Green	40.08	20.7	8.27	20.19	7.57	Loser	19	M Vs.M	G Vs.G	G Vs.G and M Vs.M
19ºr9	Observed	Without	Approach	3	Male	Green	40.08	20.7	8.27	20.19	7.57	Loser	19	M Vs.M	G Vs.G	G Vs.G and M Vs.M
19ºr9	Observed	Before	Attack	8	Male	Green	40.08	20.7	8.27	20.19	7.57	Loser	19	M Vs.M	G Vs.G	G Vs.G and M Vs.M
19ºr9	Observed	With	Attack	3	Male	Green	40.08	20.7	8.27	20.19	7.57	Loser	19	M Vs.M	G Vs.G	G Vs.G and M Vs.M
19ºr9	Observed	Without	Attack	2	Male	Green	40.08	20.7	8.27	20.19	7.57	Loser	19	M Vs.M	G Vs.G	G Vs.G and M Vs.M
19ºr9	Observed	Before	Retreat	3	Male	Green	40.08	20.7	8.27	20.19	7.57	Loser	19	M Vs.M	G Vs.G	G Vs.G and M Vs.M
19ºr9	Observed	With	Retreat	6	Male	Green	40.08	20.7	8.27	20.19	7.57	Loser	19	M Vs.M	G Vs.G	G Vs.G and M Vs.M
19ºr9	Observed	Without	Retreat	0	Male	Green	40.08	20.7	8.27	20.19	7.57	Loser	19	M Vs.M	G Vs.G	G Vs.G and M Vs.M
22º6	Non-observed	NA	NA	NA	Male	Green	46.54	25.39	10.44	24.2	9.19	Winner	22	M Vs.M	G Vs.G	G Vs.G and M Vs.M
22º6	Observed	Before	Approach	0	Male	Green	46.13	26.17	11	NA	NA	Loser	22	M Vs.M	G Vs.G	G Vs.G and M Vs.M
22º6	Observed	With	Approach	0	Male	Green	46.13	26.17	11	NA	NA	Loser	22	M Vs.M	G Vs.G	G Vs.G and M Vs.M
22º6	Observed	Without	Approach	4	Male	Green	46.13	26.17	11	NA	NA	Loser	22	M Vs.M	G Vs.G	G Vs.G and M Vs.M
22º6	Observed	Before	Attack	0	Male	Green	46.13	26.17	11	NA	NA	Loser	22	M Vs.M	G Vs.G	G Vs.G and M Vs.M
22º6	Observed	With	Attack	0	Male	Green	46.13	26.17	11	NA	NA	Loser	22	M Vs.M	G Vs.G	G Vs.G and M Vs.M
22º6	Observed	Without	Attack	1	Male	Green	46.13	26.17	11	NA	NA	Loser	22	M Vs.M	G Vs.G	G Vs.G and M Vs.M
22º6	Observed	Before	Retreat	0	Male	Green	46.13	26.17	11	NA	NA	Loser	22	M Vs.M	G Vs.G	G Vs.G and M Vs.M
22º6	Observed	With	Retreat	0	Male	Green	46.13	26.17	11	NA	NA	Loser	22	M Vs.M	G Vs.G	G Vs.G and M Vs.M
22º6	Observed	Without	Retreat	0	Male	Green	46.13	26.17	11	NA	NA	Loser	22	M Vs.M	G Vs.G	G Vs.G and M Vs.M
22ºr1	Non-observed	NA	NA	NA	Male	Red	44.86	24.36	9.84	24.4	8.75	Loser	22	M Vs.M	G Vs.R	G Vs.R and M Vs.M
22ºr1	Observed	Before	Approach	1	Male	Green	42.21	21.74	8.78	20.95	8.06	Winner	22	M Vs.M	G Vs.R	G Vs.R and M Vs.M
22ºr1	Observed	With	Approach	2	Male	Green	42.21	21.74	8.78	20.95	8.06	Winner	22	M Vs.M	G Vs.R	G Vs.R and M Vs.M
22ºr1	Observed	Without	Approach	15	Male	Green	42.21	21.74	8.78	20.95	8.06	Winner	22	M Vs.M	G Vs.R	G Vs.R and M Vs.M
22ºr1	Observed	Before	Attack	1	Male	Green	42.21	21.74	8.78	20.95	8.06	Winner	22	M Vs.M	G Vs.R	G Vs.R and M Vs.M
22ºr1	Observed	With	Attack	7	Male	Green	42.21	21.74	8.78	20.95	8.06	Winner	22	M Vs.M	G Vs.R	G Vs.R and M Vs.M
22ºr1	Observed	Without	Attack	4	Male	Green	42.21	21.74	8.78	20.95	8.06	Winner	22	M Vs.M	G Vs.R	G Vs.R and M Vs.M
22ºr1	Observed	Before	Retreat	0	Male	Green	42.21	21.74	8.78	20.95	8.06	Winner	22	M Vs.M	G Vs.R	G Vs.R and M Vs.M
22ºr1	Observed	With	Retreat	1	Male	Green	42.21	21.74	8.78	20.95	8.06	Winner	22	M Vs.M	G Vs.R	G Vs.R and M Vs.M
22ºr1	Observed	Without	Retreat	9	Male	Green	42.21	21.74	8.78	20.95	8.06	Winner	22	M Vs.M	G Vs.R	G Vs.R and M Vs.M
22ºr10	Non-observed	NA	NA	NA	Male	Green	40.79	16.83	6.38	20.96	8.76	Winner	22	M Vs.M	G Vs.G	G Vs.G and M Vs.M
22ºr10	Observed	Before	Approach	1	Male	Green	36.7	19.27	7.96	18	6.99	Loser	22	M Vs.M	G Vs.G	G Vs.G and M Vs.M
22ºr10	Observed	With	Approach	0	Male	Green	36.7	19.27	7.96	18	6.99	Loser	22	M Vs.M	G Vs.G	G Vs.G and M Vs.M
22ºr10	Observed	Without	Approach	0	Male	Green	36.7	19.27	7.96	18	6.99	Loser	22	M Vs.M	G Vs.G	G Vs.G and M Vs.M
22ºr10	Observed	Before	Attack	5	Male	Green	36.7	19.27	7.96	18	6.99	Loser	22	M Vs.M	G Vs.G	G Vs.G and M Vs.M
22ºr10	Observed	With	Attack	1	Male	Green	36.7	19.27	7.96	18	6.99	Loser	22	M Vs.M	G Vs.G	G Vs.G and M Vs.M
22ºr10	Observed	Without	Attack	1	Male	Green	36.7	19.27	7.96	18	6.99	Loser	22	M Vs.M	G Vs.G	G Vs.G and M Vs.M
22ºr10	Observed	Before	Retreat	0	Male	Green	36.7	19.27	7.96	18	6.99	Loser	22	M Vs.M	G Vs.G	G Vs.G and M Vs.M
22ºr10	Observed	With	Retreat	17	Male	Green	36.7	19.27	7.96	18	6.99	Loser	22	M Vs.M	G Vs.G	G Vs.G and M Vs.M
22ºr10	Observed	Without	Retreat	0	Male	Green	36.7	19.27	7.96	18	6.99	Loser	22	M Vs.M	G Vs.G	G Vs.G and M Vs.M
22ºr11	Non-observed	NA	NA	NA	Female	Green	39.76	20.76	8.21	19.62	7.34	Loser	22	M Vs.F	G Vs.G	G Vs.G and M Vs.F
22ºr11	Observed	Before	Approach	1	Male	Green	38.15	20.02	8.84	20.37	7.8	Winner	22	M Vs.F	G Vs.G	G Vs.G and M Vs.F
22ºr11	Observed	With	Approach	2	Male	Green	38.15	20.02	8.84	20.37	7.8	Winner	22	M Vs.F	G Vs.G	G Vs.G and M Vs.F
22ºr11	Observed	Without	Approach	0	Male	Green	38.15	20.02	8.84	20.37	7.8	Winner	22	M Vs.F	G Vs.G	G Vs.G and M Vs.F
22ºr11	Observed	Before	Attack	2	Male	Green	38.15	20.02	8.84	20.37	7.8	Winner	22	M Vs.F	G Vs.G	G Vs.G and M Vs.F
22ºr11	Observed	With	Attack	6	Male	Green	38.15	20.02	8.84	20.37	7.8	Winner	22	M Vs.F	G Vs.G	G Vs.G and M Vs.F
22ºr11	Observed	Without	Attack	7	Male	Green	38.15	20.02	8.84	20.37	7.8	Winner	22	M Vs.F	G Vs.G	G Vs.G and M Vs.F
22ºr11	Observed	Before	Retreat	0	Male	Green	38.15	20.02	8.84	20.37	7.8	Winner	22	M Vs.F	G Vs.G	G Vs.G and M Vs.F
22ºr11	Observed	With	Retreat	8	Male	Green	38.15	20.02	8.84	20.37	7.8	Winner	22	M Vs.F	G Vs.G	G Vs.G and M Vs.F
22ºr11	Observed	Without	Retreat	9	Male	Green	38.15	20.02	8.84	20.37	7.8	Winner	22	M Vs.F	G Vs.G	G Vs.G and M Vs.F
22ºr12	Non-observed	NA	NA	NA	Male	Red	55.19	33.06	14.4	29.62	11.44	Loser	22	M Vs.M	R Vs.R	R Vs.R and M Vs.M
22ºr12	Observed	Before	Approach	2	Male	Red	52.83	30.2	11.78	19.61	7.67	Winner	22	M Vs.M	R Vs.R	R Vs.R and M Vs.M
22ºr12	Observed	With	Approach	2	Male	Red	52.83	30.2	11.78	19.61	7.67	Winner	22	M Vs.M	R Vs.R	R Vs.R and M Vs.M
22ºr12	Observed	Without	Approach	4	Male	Red	52.83	30.2	11.78	19.61	7.67	Winner	22	M Vs.M	R Vs.R	R Vs.R and M Vs.M
22ºr12	Observed	Before	Attack	1	Male	Red	52.83	30.2	11.78	19.61	7.67	Winner	22	M Vs.M	R Vs.R	R Vs.R and M Vs.M
22ºr12	Observed	With	Attack	0	Male	Red	52.83	30.2	11.78	19.61	7.67	Winner	22	M Vs.M	R Vs.R	R Vs.R and M Vs.M
22ºr12	Observed	Without	Attack	5	Male	Red	52.83	30.2	11.78	19.61	7.67	Winner	22	M Vs.M	R Vs.R	R Vs.R and M Vs.M
22ºr12	Observed	Before	Retreat	0	Male	Red	52.83	30.2	11.78	19.61	7.67	Winner	22	M Vs.M	R Vs.R	R Vs.R and M Vs.M
22ºr12	Observed	With	Retreat	3	Male	Red	52.83	30.2	11.78	19.61	7.67	Winner	22	M Vs.M	R Vs.R	R Vs.R and M Vs.M
22ºr12	Observed	Without	Retreat	7	Male	Red	52.83	30.2	11.78	19.61	7.67	Winner	22	M Vs.M	R Vs.R	R Vs.R and M Vs.M
22ºr13	Non-observed	NA	NA	NA	Male	Green	49.61	24.57	10.21	25.61	9.65	Loser	22	M Vs.M	G Vs.G	G Vs.G and M Vs.M
22ºr13	Observed	Before	Approach	0	Male	Green	44.81	24.4	10.4	22.63	8.93	Winner	22	M Vs.M	G Vs.G	G Vs.G and M Vs.M
22ºr13	Observed	With	Approach	0	Male	Green	44.81	24.4	10.4	22.63	8.93	Winner	22	M Vs.M	G Vs.G	G Vs.G and M Vs.M
22ºr13	Observed	Without	Approach	0	Male	Green	44.81	24.4	10.4	22.63	8.93	Winner	22	M Vs.M	G Vs.G	G Vs.G and M Vs.M
22ºr13	Observed	Before	Attack	0	Male	Green	44.81	24.4	10.4	22.63	8.93	Winner	22	M Vs.M	G Vs.G	G Vs.G and M Vs.M
22ºr13	Observed	With	Attack	1	Male	Green	44.81	24.4	10.4	22.63	8.93	Winner	22	M Vs.M	G Vs.G	G Vs.G and M Vs.M
22ºr13	Observed	Without	Attack	0	Male	Green	44.81	24.4	10.4	22.63	8.93	Winner	22	M Vs.M	G Vs.G	G Vs.G and M Vs.M
22ºr13	Observed	Before	Retreat	0	Male	Green	44.81	24.4	10.4	22.63	8.93	Winner	22	M Vs.M	G Vs.G	G Vs.G and M Vs.M
22ºr13	Observed	With	Retreat	13	Male	Green	44.81	24.4	10.4	22.63	8.93	Winner	22	M Vs.M	G Vs.G	G Vs.G and M Vs.M
22ºr13	Observed	Without	Retreat	0	Male	Green	44.81	24.4	10.4	22.63	8.93	Winner	22	M Vs.M	G Vs.G	G Vs.G and M Vs.M
22ºr14	Non-observed	NA	NA	NA	Male	Green	50.87	28.4	12.01	28.59	10.5	Winner	22	M Vs.M	G Vs.G	G Vs.G and M Vs.M
22ºr14	Observed	Before	Approach	1	Male	Green	44.84	25.89	9.69	21.87	8.58	Loser	22	M Vs.M	G Vs.G	G Vs.G and M Vs.M
22ºr14	Observed	With	Approach	0	Male	Green	44.84	25.89	9.69	21.87	8.58	Loser	22	M Vs.M	G Vs.G	G Vs.G and M Vs.M
22ºr14	Observed	Without	Approach	2	Male	Green	44.84	25.89	9.69	21.87	8.58	Loser	22	M Vs.M	G Vs.G	G Vs.G and M Vs.M
22ºr14	Observed	Before	Attack	0	Male	Green	44.84	25.89	9.69	21.87	8.58	Loser	22	M Vs.M	G Vs.G	G Vs.G and M Vs.M
22ºr14	Observed	With	Attack	0	Male	Green	44.84	25.89	9.69	21.87	8.58	Loser	22	M Vs.M	G Vs.G	G Vs.G and M Vs.M
22ºr14	Observed	Without	Attack	0	Male	Green	44.84	25.89	9.69	21.87	8.58	Loser	22	M Vs.M	G Vs.G	G Vs.G and M Vs.M
22ºr14	Observed	Before	Retreat	1	Male	Green	44.84	25.89	9.69	21.87	8.58	Loser	22	M Vs.M	G Vs.G	G Vs.G and M Vs.M
22ºr14	Observed	With	Retreat	0	Male	Green	44.84	25.89	9.69	21.87	8.58	Loser	22	M Vs.M	G Vs.G	G Vs.G and M Vs.M
22ºr14	Observed	Without	Retreat	10	Male	Green	44.84	25.89	9.69	21.87	8.58	Loser	22	M Vs.M	G Vs.G	G Vs.G and M Vs.M
22ºr15	Non-observed	NA	NA	NA	Female	Green	48.42	24.93	8.82	24.2	8.62	Winner	22	F Vs.F	G Vs.G	G Vs.G and F Vs.F
22ºr15	Observed	Before	Approach	0	Female	Green	40.87	21.06	8.1	14.48	5	Loser	22	F Vs.F	G Vs.G	G Vs.G and F Vs.F
22ºr15	Observed	With	Approach	0	Female	Green	40.87	21.06	8.1	14.48	5	Loser	22	F Vs.F	G Vs.G	G Vs.G and F Vs.F
22ºr15	Observed	Without	Approach	1	Female	Green	40.87	21.06	8.1	14.48	5	Loser	22	F Vs.F	G Vs.G	G Vs.G and F Vs.F
22ºr15	Observed	Before	Attack	0	Female	Green	40.87	21.06	8.1	14.48	5	Loser	22	F Vs.F	G Vs.G	G Vs.G and F Vs.F
22ºr15	Observed	With	Attack	0	Female	Green	40.87	21.06	8.1	14.48	5	Loser	22	F Vs.F	G Vs.G	G Vs.G and F Vs.F
22ºr15	Observed	Without	Attack	0	Female	Green	40.87	21.06	8.1	14.48	5	Loser	22	F Vs.F	G Vs.G	G Vs.G and F Vs.F
22ºr15	Observed	Before	Retreat	0	Female	Green	40.87	21.06	8.1	14.48	5	Loser	22	F Vs.F	G Vs.G	G Vs.G and F Vs.F
22ºr15	Observed	With	Retreat	0	Female	Green	40.87	21.06	8.1	14.48	5	Loser	22	F Vs.F	G Vs.G	G Vs.G and F Vs.F
22ºr15	Observed	Without	Retreat	1	Female	Green	40.87	21.06	8.1	14.48	5	Loser	22	F Vs.F	G Vs.G	G Vs.G and F Vs.F
22ºr16	Non-observed	NA	NA	NA	Female	Green	44.44	20.89	8.97	19.82	8.06	Loser	22	F Vs.F	G Vs.G	G Vs.G and F Vs.F
22ºr16	Observed	Before	Approach	1	Female	Green	40.01	23.61	8.31	20.7	7.95	Winner	22	F Vs.F	G Vs.G	G Vs.G and F Vs.F
22ºr16	Observed	With	Approach	0	Female	Green	40.01	23.61	8.31	20.7	7.95	Winner	22	F Vs.F	G Vs.G	G Vs.G and F Vs.F
22ºr16	Observed	Without	Approach	0	Female	Green	40.01	23.61	8.31	20.7	7.95	Winner	22	F Vs.F	G Vs.G	G Vs.G and F Vs.F
22ºr16	Observed	Before	Attack	8	Female	Green	40.01	23.61	8.31	20.7	7.95	Winner	22	F Vs.F	G Vs.G	G Vs.G and F Vs.F
22ºr16	Observed	With	Attack	0	Female	Green	40.01	23.61	8.31	20.7	7.95	Winner	22	F Vs.F	G Vs.G	G Vs.G and F Vs.F
22ºr16	Observed	Without	Attack	0	Female	Green	40.01	23.61	8.31	20.7	7.95	Winner	22	F Vs.F	G Vs.G	G Vs.G and F Vs.F
22ºr16	Observed	Before	Retreat	1	Female	Green	40.01	23.61	8.31	20.7	7.95	Winner	22	F Vs.F	G Vs.G	G Vs.G and F Vs.F
22ºr16	Observed	With	Retreat	3	Female	Green	40.01	23.61	8.31	20.7	7.95	Winner	22	F Vs.F	G Vs.G	G Vs.G and F Vs.F
22ºr16	Observed	Without	Retreat	0	Female	Green	40.01	23.61	8.31	20.7	7.95	Winner	22	F Vs.F	G Vs.G	G Vs.G and F Vs.F
22ºr2	Non-observed	NA	NA	NA	Male	Green	39.09	20.42	8.03	18.32	7.64	Winner	22	M Vs.M	G Vs.G	G Vs.G and M Vs.M
22ºr2	Observed	Before	Approach	0	Male	Green	38.12	20.45	8.37	17.69	7.34	Loser	22	M Vs.M	G Vs.G	G Vs.G and M Vs.M
22ºr2	Observed	With	Approach	0	Male	Green	38.12	20.45	8.37	17.69	7.34	Loser	22	M Vs.M	G Vs.G	G Vs.G and M Vs.M
22ºr2	Observed	Without	Approach	0	Male	Green	38.12	20.45	8.37	17.69	7.34	Loser	22	M Vs.M	G Vs.G	G Vs.G and M Vs.M
22ºr2	Observed	Before	Attack	0	Male	Green	38.12	20.45	8.37	17.69	7.34	Loser	22	M Vs.M	G Vs.G	G Vs.G and M Vs.M
22ºr2	Observed	With	Attack	0	Male	Green	38.12	20.45	8.37	17.69	7.34	Loser	22	M Vs.M	G Vs.G	G Vs.G and M Vs.M
22ºr2	Observed	Without	Attack	0	Male	Green	38.12	20.45	8.37	17.69	7.34	Loser	22	M Vs.M	G Vs.G	G Vs.G and M Vs.M
22ºr2	Observed	Before	Retreat	0	Male	Green	38.12	20.45	8.37	17.69	7.34	Loser	22	M Vs.M	G Vs.G	G Vs.G and M Vs.M
22ºr2	Observed	With	Retreat	0	Male	Green	38.12	20.45	8.37	17.69	7.34	Loser	22	M Vs.M	G Vs.G	G Vs.G and M Vs.M
22ºr2	Observed	Without	Retreat	11	Male	Green	38.12	20.45	8.37	17.69	7.34	Loser	22	M Vs.M	G Vs.G	G Vs.G and M Vs.M
22ºr3	Non-observed	NA	NA	NA	Male	Green	42.68	19.11	6.59	21.15	8.41	Winner	22	M Vs.M	G Vs.G	G Vs.G and M Vs.M
22ºr3	Observed	Before	Approach	0	Male	Green	43.78	24.28	9.28	23.3	8.49	Loser	22	M Vs.M	G Vs.G	G Vs.G and M Vs.M
22ºr3	Observed	With	Approach	0	Male	Green	43.78	24.28	9.28	23.3	8.49	Loser	22	M Vs.M	G Vs.G	G Vs.G and M Vs.M
22ºr3	Observed	Without	Approach	6	Male	Green	43.78	24.28	9.28	23.3	8.49	Loser	22	M Vs.M	G Vs.G	G Vs.G and M Vs.M
22ºr3	Observed	Before	Attack	0	Male	Green	43.78	24.28	9.28	23.3	8.49	Loser	22	M Vs.M	G Vs.G	G Vs.G and M Vs.M
22ºr3	Observed	With	Attack	1	Male	Green	43.78	24.28	9.28	23.3	8.49	Loser	22	M Vs.M	G Vs.G	G Vs.G and M Vs.M
22ºr3	Observed	Without	Attack	8	Male	Green	43.78	24.28	9.28	23.3	8.49	Loser	22	M Vs.M	G Vs.G	G Vs.G and M Vs.M
22ºr3	Observed	Before	Retreat	0	Male	Green	43.78	24.28	9.28	23.3	8.49	Loser	22	M Vs.M	G Vs.G	G Vs.G and M Vs.M
22ºr3	Observed	With	Retreat	13	Male	Green	43.78	24.28	9.28	23.3	8.49	Loser	22	M Vs.M	G Vs.G	G Vs.G and M Vs.M
22ºr3	Observed	Without	Retreat	0	Male	Green	43.78	24.28	9.28	23.3	8.49	Loser	22	M Vs.M	G Vs.G	G Vs.G and M Vs.M
22ºr4	Non-observed	NA	NA	NA	Female	Green	33.97	16.82	6.53	16.55	6.19	Winner	22	M Vs.F	G Vs.G	G Vs.G and M Vs.F
22ºr4	Observed	Before	Approach	0	Male	Green	34.31	19.18	9.28	17.85	6.95	Loser	22	M Vs.F	G Vs.G	G Vs.G and M Vs.F
22ºr4	Observed	With	Approach	0	Male	Green	34.31	19.18	9.28	17.85	6.95	Loser	22	M Vs.F	G Vs.G	G Vs.G and M Vs.F
22ºr4	Observed	Without	Approach	0	Male	Green	34.31	19.18	9.28	17.85	6.95	Loser	22	M Vs.F	G Vs.G	G Vs.G and M Vs.F
22ºr4	Observed	Before	Attack	0	Male	Green	34.31	19.18	9.28	17.85	6.95	Loser	22	M Vs.F	G Vs.G	G Vs.G and M Vs.F
22ºr4	Observed	With	Attack	0	Male	Green	34.31	19.18	9.28	17.85	6.95	Loser	22	M Vs.F	G Vs.G	G Vs.G and M Vs.F
22ºr4	Observed	Without	Attack	0	Male	Green	34.31	19.18	9.28	17.85	6.95	Loser	22	M Vs.F	G Vs.G	G Vs.G and M Vs.F
22ºr4	Observed	Before	Retreat	0	Male	Green	34.31	19.18	9.28	17.85	6.95	Loser	22	M Vs.F	G Vs.G	G Vs.G and M Vs.F
22ºr4	Observed	With	Retreat	0	Male	Green	34.31	19.18	9.28	17.85	6.95	Loser	22	M Vs.F	G Vs.G	G Vs.G and M Vs.F
22ºr4	Observed	Without	Retreat	2	Male	Green	34.31	19.18	9.28	17.85	6.95	Loser	22	M Vs.F	G Vs.G	G Vs.G and M Vs.F
22ºr5	Non-observed	NA	NA	NA	Female	Red	42.76	21.46	8.66	20.88	8.12	Loser	22	M Vs.F	G Vs.R	G Vs.R and M Vs.F
22ºr5	Observed	Before	Approach	0	Male	Green	43.33	22.2	8.35	23.72	8.83	Winner	22	M Vs.F	G Vs.R	G Vs.R and M Vs.F
22ºr5	Observed	With	Approach	0	Male	Green	43.33	22.2	8.35	23.72	8.83	Winner	22	M Vs.F	G Vs.R	G Vs.R and M Vs.F
22ºr5	Observed	Without	Approach	0	Male	Green	43.33	22.2	8.35	23.72	8.83	Winner	22	M Vs.F	G Vs.R	G Vs.R and M Vs.F
22ºr5	Observed	Before	Attack	0	Male	Green	43.33	22.2	8.35	23.72	8.83	Winner	22	M Vs.F	G Vs.R	G Vs.R and M Vs.F
22ºr5	Observed	With	Attack	0	Male	Green	43.33	22.2	8.35	23.72	8.83	Winner	22	M Vs.F	G Vs.R	G Vs.R and M Vs.F
22ºr5	Observed	Without	Attack	0	Male	Green	43.33	22.2	8.35	23.72	8.83	Winner	22	M Vs.F	G Vs.R	G Vs.R and M Vs.F
22ºr5	Observed	Before	Retreat	0	Male	Green	43.33	22.2	8.35	23.72	8.83	Winner	22	M Vs.F	G Vs.R	G Vs.R and M Vs.F
22ºr5	Observed	With	Retreat	10	Male	Green	43.33	22.2	8.35	23.72	8.83	Winner	22	M Vs.F	G Vs.R	G Vs.R and M Vs.F
22ºr5	Observed	Without	Retreat	0	Male	Green	43.33	22.2	8.35	23.72	8.83	Winner	22	M Vs.F	G Vs.R	G Vs.R and M Vs.F
22ºr7	Non-observed	NA	NA	NA	Male	Red	49.24	28.12	11.27	26.93	9.88	Loser	22	M Vs.M	G Vs.R	G Vs.R and M Vs.M
22ºr7	Observed	Before	Approach	0	Male	Green	49.4	27.19	11.43	26.09	10.28	Winner	22	M Vs.M	G Vs.R	G Vs.R and M Vs.M
22ºr7	Observed	With	Approach	0	Male	Green	49.4	27.19	11.43	26.09	10.28	Winner	22	M Vs.M	G Vs.R	G Vs.R and M Vs.M
22ºr7	Observed	Without	Approach	4	Male	Green	49.4	27.19	11.43	26.09	10.28	Winner	22	M Vs.M	G Vs.R	G Vs.R and M Vs.M
22ºr7	Observed	Before	Attack	0	Male	Green	49.4	27.19	11.43	26.09	10.28	Winner	22	M Vs.M	G Vs.R	G Vs.R and M Vs.M
22ºr7	Observed	With	Attack	0	Male	Green	49.4	27.19	11.43	26.09	10.28	Winner	22	M Vs.M	G Vs.R	G Vs.R and M Vs.M
22ºr7	Observed	Without	Attack	2	Male	Green	49.4	27.19	11.43	26.09	10.28	Winner	22	M Vs.M	G Vs.R	G Vs.R and M Vs.M
22ºr7	Observed	Before	Retreat	0	Male	Green	49.4	27.19	11.43	26.09	10.28	Winner	22	M Vs.M	G Vs.R	G Vs.R and M Vs.M
22ºr7	Observed	With	Retreat	5	Male	Green	49.4	27.19	11.43	26.09	10.28	Winner	22	M Vs.M	G Vs.R	G Vs.R and M Vs.M
22ºr7	Observed	Without	Retreat	1	Male	Green	49.4	27.19	11.43	26.09	10.28	Winner	22	M Vs.M	G Vs.R	G Vs.R and M Vs.M
22ºr8	Non-observed	NA	NA	NA	Male	Green	39.16	22.31	9.48	20.9	8.27	Loser	22	M Vs.M	R Vs.G	R Vs.G and M Vs.M
22ºr8	Observed	Before	Approach	1	Male	Red	61.08	36.66	15.55	35.65	13.22	Winner	22	M Vs.M	R Vs.G	R Vs.G and M Vs.M
22ºr8	Observed	With	Approach	1	Male	Red	61.08	36.66	15.55	35.65	13.22	Winner	22	M Vs.M	R Vs.G	R Vs.G and M Vs.M
22ºr8	Observed	Without	Approach	11	Male	Red	61.08	36.66	15.55	35.65	13.22	Winner	22	M Vs.M	R Vs.G	R Vs.G and M Vs.M
22ºr8	Observed	Before	Attack	2	Male	Red	61.08	36.66	15.55	35.65	13.22	Winner	22	M Vs.M	R Vs.G	R Vs.G and M Vs.M
22ºr8	Observed	With	Attack	3	Male	Red	61.08	36.66	15.55	35.65	13.22	Winner	22	M Vs.M	R Vs.G	R Vs.G and M Vs.M
22ºr8	Observed	Without	Attack	4	Male	Red	61.08	36.66	15.55	35.65	13.22	Winner	22	M Vs.M	R Vs.G	R Vs.G and M Vs.M
22ºr8	Observed	Before	Retreat	0	Male	Red	61.08	36.66	15.55	35.65	13.22	Winner	22	M Vs.M	R Vs.G	R Vs.G and M Vs.M
22ºr8	Observed	With	Retreat	0	Male	Red	61.08	36.66	15.55	35.65	13.22	Winner	22	M Vs.M	R Vs.G	R Vs.G and M Vs.M
22ºr8	Observed	Without	Retreat	1	Male	Red	61.08	36.66	15.55	35.65	13.22	Winner	22	M Vs.M	R Vs.G	R Vs.G and M Vs.M
22ºr9	Non-observed	NA	NA	NA	Male	Green	48.25	28.09	11.8	24.33	10.03	Winner	22	M Vs.M	G Vs.G	G Vs.G and M Vs.M
22ºr9	Observed	Before	Approach	0	Male	Green	41.68	21.14	9.2	19.75	7.88	Loser	22	M Vs.M	G Vs.G	G Vs.G and M Vs.M
22ºr9	Observed	With	Approach	2	Male	Green	41.68	21.14	9.2	19.75	7.88	Loser	22	M Vs.M	G Vs.G	G Vs.G and M Vs.M
22ºr9	Observed	Without	Approach	4	Male	Green	41.68	21.14	9.2	19.75	7.88	Loser	22	M Vs.M	G Vs.G	G Vs.G and M Vs.M
22ºr9	Observed	Before	Attack	0	Male	Green	41.68	21.14	9.2	19.75	7.88	Loser	22	M Vs.M	G Vs.G	G Vs.G and M Vs.M
22ºr9	Observed	With	Attack	2	Male	Green	41.68	21.14	9.2	19.75	7.88	Loser	22	M Vs.M	G Vs.G	G Vs.G and M Vs.M
22ºr9	Observed	Without	Attack	10	Male	Green	41.68	21.14	9.2	19.75	7.88	Loser	22	M Vs.M	G Vs.G	G Vs.G and M Vs.M
22ºr9	Observed	Before	Retreat	0	Male	Green	41.68	21.14	9.2	19.75	7.88	Loser	22	M Vs.M	G Vs.G	G Vs.G and M Vs.M
22ºr9	Observed	With	Retreat	1	Male	Green	41.68	21.14	9.2	19.75	7.88	Loser	22	M Vs.M	G Vs.G	G Vs.G and M Vs.M
22ºr9	Observed	Without	Retreat	6	Male	Green	41.68	21.14	9.2	19.75	7.88	Loser	22	M Vs.M	G Vs.G	G Vs.G and M Vs.M
